1 **Nuclear RNA export factor variant initiates piRNA-guided co-transcriptional**  
2 **silencing**

3

4 **Kensaku Murano,<sup>1,†</sup> Yuka W. Iwasaki,<sup>1,†,\*</sup> Hirotsugu Ishizu,<sup>1</sup> Akane Mashiko,<sup>1,2</sup>**  
5 **Aoi Shibuya,<sup>1</sup> Shu Kondo,<sup>3</sup> Shungo Adachi,<sup>4</sup> Saori Suzuki,<sup>5</sup> Kuniaki Saito,<sup>3</sup>**  
6 **Tohru Natsume,<sup>4</sup> Mikiko C. Siomi,<sup>5</sup> Haruhiko Siomi<sup>1,6\*</sup>**

7

8 <sup>1</sup>Department of Molecular Biology, Keio University School of Medicine, Tokyo  
9 160-8582, Japan; <sup>2</sup>Graduate School of Engineering, Yokohama National University,  
10 Yokohama 240-8501, Japan; <sup>3</sup>Invertebrate Genetics Laboratory, National Institute of  
11 Genetics, Mishima, Shizuoka 411-8540, Japan; <sup>4</sup>Molecular Profiling Research Center  
12 for Drug Discovery, National Institute of Advanced Industrial Science and Technology,  
13 Tokyo 135-0064, Japan; <sup>5</sup>Department of Biological Sciences, Graduate School of  
14 Science, The University of Tokyo, Tokyo 113-0032, Japan

15 <sup>6</sup>Lead Contact

16

17 <sup>†</sup>These authors contributed equally to this work.

18

19 \*Corresponding authors: [iwasaki@keio.jp](mailto:iwasaki@keio.jp) (Y.W.I.), [awa403@keio.jp](mailto:awa403@keio.jp) (H.S.)

20

## 1 **Summary**

2           The PIWI-interacting RNA (piRNA) pathway preserves genomic integrity by  
3 repressing transposable elements (TEs) in animal germ cells. Among PIWI-clade  
4 proteins in *Drosophila*, Piwi transcriptionally silences its targets through interactions  
5 with cofactors, including Panoramix (Panx) and forms heterochromatin characterized by  
6 H3K9me3 and H1. Here, we identified Nxf2, a nuclear RNA export factor (NXF)  
7 variant, as a protein that forms complexes with Piwi, Panx, and p15. Panx-Nxf2-p15  
8 complex formation is necessary in the silencing by stabilizing protein levels of Nxf2  
9 and Panx. Notably, ectopic targeting of Nxf2 initiates co-transcriptional repression of  
10 the target reporter in a manner independent of H3K9me3 marks or H1. However,  
11 continuous silencing requires HP1a and H1. In addition, Nxf2 directly interacts with  
12 target TE transcripts in a Piwi-dependent manner. These findings suggest a model in  
13 which the Nxf2-Panx-p15 complex enforces the association of Piwi with target  
14 transcripts to trigger co-transcriptional repression, prior to heterochromatin formation in  
15 the nuclear piRNA pathway.

16

## 17 **Highlights**

- 18 1. Nxf2 plays an essential role in the Piwi-piRNA pathway
- 19 2. Formation of Piwi-Panx-Nxf2-p15 (PPNP) complexes stabilizes both Panx and Nxf2
- 20 3. The PPNP complex triggers transcriptional silencing before heterochromatin  
21 formation
- 22 4. Nxf2 directly binds to target transcripts in a Piwi-dependent manner

23

## 1 Introduction

2 Transposable elements (TEs) act as endogenous mobile mutagens to alter the sequence  
3 and structure of the genome, thereby changing the transcriptome and chromatin  
4 structure. TEs are often deleterious to the host by, for example, disrupting a gene, but  
5 may also be adaptive and drive genome evolution (Chuong et al., 2017; Han and Boeke,  
6 2005). TEs comprise nearly half of the human genome and approximately 30% of the  
7 genome of *Drosophila melanogaster*; thus, the successively arising families of TEs are  
8 the main drivers of genome expansion. In metazoans, TEs are silenced by the piRNA  
9 pathway, in which Piwi proteins are guided by Piwi-interacting RNAs (piRNAs) to their  
10 targets (Ernst et al., 2017; Iwasaki et al., 2015; Ozata et al., 2019). The piRNA pathway  
11 is also essential for germline development and fertility in animals (Carmell et al., 2007;  
12 Cox et al., 1998; Houwing et al., 2007; Lin and Spradling, 1997).

13

14 In the *Drosophila* ovary, two cytoplasmic PIWI paralogs, AGO3 and Aubergine (Aub),  
15 engage an amplification loop termed the “ping-pong cycle” to cleave both TE  
16 transcripts and long piRNA precursor transcripts arising from piRNA clusters, which  
17 comprise a large number as well as various types of fragmented TEs, leading to the  
18 post-transcriptional silencing of TEs and production of piRNAs (Brennecke et al., 2007;  
19 Gunawardane et al., 2007). These piRNAs can in turn trigger the production of phased  
20 piRNAs from piRNA precursors, which generates a dazzling variety of piRNAs and is  
21 coupled to the activity of a third Piwi protein (Han et al., 2015; Homolka et al., 2015;  
22 Mohn et al., 2015). Phased piRNAs are also produced in ovarian somatic cells by a  
23 ping-pong cycle-independent mechanism, which are in turn also loaded onto Piwi (Han  
24 et al., 2015; Mohn et al., 2015). This loading initiates the transport of Piwi into the

1 nucleus where it drives the transcriptional silencing of target TEs, by inducing specific  
2 histone modification and/or facilitating the folding of chromatin into a higher-order  
3 structure (Iwasaki et al., 2016).

4  
5 Lack of the nuclear Piwi activity results in de-repression of TEs, which is concomitant  
6 with decreases in both H3K9me3 repressive epigenetic marks and RNA polymerase II  
7 (Pol II) occupancy on target TE loci (Donertas et al., 2013; Huang et al., 2013; Le  
8 Thomas et al., 2013; Ohtani et al., 2013; Rozhkov et al., 2013; Sienski et al., 2012).  
9 This suggests a scenario of how the nuclear piRNA pathway works: Piwi and its bound  
10 piRNAs scan for target TEs by complementary base-pairing with their nascent  
11 transcripts. Upon targeting, Piwi recruits chromatin factors including H3K9me3  
12 methyltransferases such as Eggless (also called dSetDB1) to initiate heterochromatin  
13 formation. The H3K9me3 modification is then bound by HP1a to maintain and  
14 propagate epigenetic silencing. However, thus far, direct association of the Piwi-piRNA  
15 complex with target transcripts and/or H3K9me3 methyltransferases has not been  
16 demonstrated.

17  
18 Furthermore, depletion of Maelstrom (Mael), a Piwi cofactor in the nuclear piRNA  
19 pathway, does not decrease H3K9me3 levels at Piwi-targeted TE loci, suggesting that  
20 the repressive histone mark *per se* is not the final silencing mark for transcriptional gene  
21 silencing mediated by Piwi-piRNA complexes (Sienski et al., 2012). Recently, we  
22 identified linker histone H1 as a component of a nuclear Piwi complex and found that  
23 depletion of H1 de-represses Piwi-targeted TEs and their surrounding genes without  
24 affecting the density of H3K9me3 marks and HP1a at target TE loci (Iwasaki et al.,

1 2016). Instead, we demonstrated that the chromatin accessibility at Piwi-targeted TE  
2 loci is modulated by H1. These findings suggested a model in which Piwi recruits H1  
3 and forces it to stay on target TE loci to induce chromatin compaction, thereby  
4 repressing target TE transcription, and that the nuclear piRNA pathway adopts  
5 collaborated actions of H1 and H3K9me3 mark to maintain silencing of the TE state by  
6 modulating the chromatin state.

7

8 In addition to Mael and H1, biochemical and genetic analyses have also identified a  
9 number of putative Piwi cofactors including DmGTSF1/Asterix (Arx) and Panoramix  
10 (Panx)/Silencio (Brower-Toland et al., 2007; Czech et al., 2013; Donertas et al., 2013;  
11 Le Thomas et al., 2013; Muerdter et al., 2013; Ohtani et al., 2013; Sienski et al., 2015;  
12 Sienski et al., 2012; Wang and Elgin, 2011; Yu et al., 2015). These findings together  
13 suggest that multiple pathways leading to Piwi-mediated TE silencing may exist, and  
14 raise the question of whether these pathways are independently initiated or have a  
15 common initial event.

16

17 To investigate this issue, we reanalyzed Panx, which interacts with Piwi and promotes  
18 the deposition of H3K9me3 marks on target TE chromatin by H3K9me3 histone  
19 methyltransferase, Eggless (Sienski et al., 2015; Yu et al., 2015). Here, we  
20 biochemically isolated Nxf2, nuclear RNA export factor (NXF) variant, as a component  
21 of Panx-associated complexes. Nxf2 further associates with p15 (also called Nxt1), a  
22 co-adaptor for nuclear RNA export (Fribourg et al., 2001; Herold et al., 2001; Kerkow  
23 et al., 2012). The NXF family comprises four members in *Drosophila*, among which  
24 Nxf1 is an essential mRNA nucleocytoplasmic export factor (Bjork and Wieslander,

1 2014; Izaurralde, 2002; Stutz and Izaurralde, 2003; Wickramasinghe and Laskey, 2015).  
2 However, other members (Nxf2-4) are gonad-specific and their functions are not known,  
3 although they share common domain structures with Nxf1 (Herold et al., 2001; Herold  
4 et al., 2000; Herold et al., 2003). Detailed analysis of Nxf2 function in the nuclear  
5 piRNA pathway revealed that the interactions between Panx, Nxf2, and p15 are  
6 necessary to maintain the protein stability of Nxf2 and Panx. Moreover, ectopic  
7 targeting of Nxf2 initiates co-transcriptional repression of the target reporter gene prior  
8 to heterochromatin formation, and H3K9me3 marks and H1 are required at later time  
9 points. Notably, the RNA binding domain of Nxf2 is essential for recruitment of the  
10 complex to target TEs. CLIP experiments demonstrated that both Piwi and Nxf2  
11 directly interact with Piwi-targeted TE transcripts and that the association of Nxf2 with  
12 target TE transcripts is Piwi-dependent. These results suggest that Nxf2 enforces the  
13 association of Piwi-Panx-Nxf2-p15 (PPNP) complexes with the nascent transcripts of  
14 target TEs, and triggers co-transcriptional repression in the nuclear silencing pathway.  
15 Our results provide an unexpected connection between an NXF variant and small  
16 RNA-mediated co-transcriptional silencing.

17

## 1 Results

### 2 Nxf2 forms a complex with Piwi and Panx, and plays an essential role in the 3 piRNA pathway

4 To reveal the precise mechanism by which Piwi–piRNA complexes transcriptionally  
5 silence TEs, we raised a monoclonal antibody that specifically recognises Panx (Figure  
6 S1A). Using this antibody, Panx-associated complexes were immunopurified from  
7 OSCs, a cultured ovarian somatic cell line, in which piRNA-guided silencing operates  
8 (Saito et al., 2009). Mass spectrometry analysis of the purified complexes (Figure 1A,  
9 Table S1) revealed that, in addition to Piwi, Nxf2 is present in the associated complexes.  
10 Nxf2 is a variant of the nuclear RNA export factor (NXF) family, which harbours  
11 similar domain structures (Herold et al., 2001; Herold et al., 2000; Herold et al., 2003)  
12 (see also Figure S1H). Among NXF variants, Nxf1 is highly conserved, ubiquitously  
13 expressed, and well known to be involved in the nuclear export of various mRNAs  
14 (Bjork and Wieslander, 2014; Izaurralde, 2002; Stutz and Izaurralde, 2003;  
15 Wickramasinghe and Laskey, 2015). However, Nxf2 and Nxf3 are almost exclusively  
16 expressed in the ovary, while Nxf4 is specifically expressed in the testis (Gramates et al.,  
17 2017). NXF variants other than Nxf1 are not involved in general mRNA export (Herold  
18 et al., 2001; Herold et al., 2003) and their functions remain to be revealed. By using a  
19 specific monoclonal antibody generated against Nxf2 (Figure S1B), we confirmed the  
20 interaction among Panx, Piwi, and Nxf2 in both OSCs and *Drosophila* ovary (Figures  
21 S1C and S1D). Immunoprecipitation followed by nuclear extraction also detected  
22 Piwi-Panx-Nxf2 complex (Figures 1B, S1E, and S1F). In addition, Panx and Nxf2  
23 co-localised at the nucleus (Figure S1G), suggesting that the complex is formed within  
24 the nucleus. The interaction of Panx with NXF variants is restricted to Nxf2 (Figures

1 **S1H and S1I**). Thus, we focused on the function of Nxf2 in the Piwi–piRNA pathway.  
2  
3 To identify transcripts regulated by Nxf2, we performed mRNA-seq analysis of OSCs  
4 under Nxf2 knockdown (KD), and compared the results with those obtained for Piwi-  
5 and Panx-KD OSCs (**Figures 1C, 1D, and S1J**). TEs that were de-silenced upon Piwi  
6 depletion (Iwasaki et al., 2016) were also specifically de-silenced upon depletion of  
7 Panx or Nxf2. For example, *mdg1* and *gypsy* were among the most highly de-silenced  
8 TEs in Nxf2-, Panx-, and Piwi-KD experiments. Panx- and Nxf2-KD resulted in nearly  
9 identical patterns of TE de-silencing, albeit to a lesser extent than Piwi-KD, possibly  
10 because Piwi functions not only in TE silencing but also in piRNA biogenesis (see also  
11 **Figure 1H**). These results suggest that Nxf2 regulates TEs in the Piwi–piRNA pathway,  
12 in a manner resembling Panx, and are consistent with previous reports describing that  
13 Nxf2 was included in the list of candidate co-factors for the piRNA pathway identified  
14 by RNAi screening (Czech et al., 2013; Handler et al., 2013; Muerdter et al., 2013).  
15  
16 Depletion of Piwi has been shown to result in the reduction of H3K9me3 marks and H1  
17 in the regions neighbouring TE insertions, resulting in de-repression of coding genes  
18 located near TEs (Iwasaki et al., 2016; Sienski et al., 2012). Coding genes that were  
19 de-repressed upon Nxf2-KD were highly similar to those observed in Piwi-KD,  
20 suggesting that Nxf2 also regulates genes located near TE insertions. The population of  
21 differentially expressed genes (DEGs) and their fold change were smaller in Nxf2-KD  
22 (**Figures S1K–M**), in line with the lower extent of TE de-silencing in Nxf2-KD (**Figures**  
23 **1C and 1D**). These results indicate that Nxf2 functions in the Piwi–piRNA pathway,  
24 and does not affect the expression pattern of bulk mRNA, consistent with the previous



1 finding that Nxf1 is the only member of the *Drosophila* NXF family that mediates the  
2 export of mRNAs (Herold et al., 2001; Herold et al., 2003).

3

4 We further analysed the H3K9me3 levels in these corresponding regions. ChIP-seq  
5 analysis of H3K9me3 marks at the euchromatic insertions of piRNA target TEs  
6 revealed that the depletion of Nxf2 decreased the H3K9me3 levels at these loci, similar  
7 to the case in Piwi or Panx depletion (Figures 1E–G). Notably, a severe decrease of  
8 H3K9me3 marks was observed not only at the TE insertions but also at the regions  
9 surrounding TE insertions (Figure 1E). The effect of Nxf2 or Panx depletion was  
10 weaker than that of Piwi depletion, and the results of Nxf2 and Panx depletion highly  
11 resembled each other, consistent with the effects on the expression levels of TEs  
12 observed by RNA-seq (Figures 1C and 1D). The analysis focusing on the TE consensus  
13 sequence confirmed that the effect on the H3K9me3 level was limited to the TEs  
14 targeted by Piwi–piRNA complexes (Figure 1G). Furthermore, the depletion of Nxf2 in  
15 OSCs did not affect the expression levels of piRNAs (Figure 1H), indicating that  
16 piRNA biogenesis including piRNA precursor export to the cytoplasm occurs in the  
17 absence of Nxf2. Together, these results indicate that Nxf2 is a key factor required for  
18 transcriptional silencing in the Piwi–piRNA pathway.

19

## 20 **Formation of Panx-Nxf2-p15 complex is essential for stabilization of Panx and** 21 **Nxf2 protein levels**

22 To further characterize the Piwi-Panx-Nxf2 complex, we immunopurified flag-tagged  
23 Nxf2 expressed in OSCs (Figure S2A), which was then subjected to shotgun proteome  
24 analysis (Figure S2B, Table S2). This analysis not only confirmed the presence of Panx

1 and Piwi, but further detected p15, also known as Nxf1, in Nxf2-associated complexes  
2 (see also Figure S6C). We confirmed the interaction of Nxf2 with p15 in OSCs (Figure  
3 2A), and p15 was also co-immunoprecipitated with Panx (Figure S2C). These results  
4 suggest the formation of a Piwi-Panx-Nxf2-p15 complex, which we hereafter call the  
5 PPNP complex. p15 is a co-adaptor for nuclear RNA export and has been shown to  
6 form a heterodimeric complex with NXF proteins (Fribourg et al., 2001; Herold et al.,  
7 2001; Kerkow et al., 2012). Both Nxf1 and p15 are highly conserved from yeast to  
8 mammals, and the Nxf1-p15 complexes bind to mRNAs without strong sequence  
9 preference and have the ability to export mRNAs through the nuclear pore complex  
10 (NPC) (Herold et al., 2001; Levesque et al., 2001; Wiegand et al., 2002; Wilkie et al.,  
11 2001). Although a previous study showed that recombinant p15 can associate with Nxf1,  
12 Nxf2, and Nxf3 proteins, only the Nxf1-p15 complexes function in mRNA export, and  
13 the role of p15's association with Nxf2 and Nxf3 remains unknown (Herold et al., 2001).  
14 We therefore analysed the involvement of p15 in Nxf2-mediated transcriptional  
15 silencing.

16

17 Depletion of p15 resulted in specific de-repression of Piwi-piRNA-targeted TE (Figure  
18 2B). It was previously shown that p15 heterodimerises with human and *C. elegans* Nxf1  
19 at its NTF2 (nuclear transport factor 2)-like domains (Fribourg et al., 2001; Klenov et  
20 al., 2014). We therefore analysed the interaction between p15 and Nxf2 mutant without  
21 NTF2-like domain (Figures S2D and S2E). This mutant could not associate with p15,  
22 and the rescue experiment showed that the NTF2-like domain of Nxf2 is indispensable  
23 for the silencing of *mdg1* TE (Figure S2F). These results suggest that the NTF2-like  
24 domain of Nxf2 associates with p15, as in the case of Nxf1, and this association is

1 necessary for TE silencing.  
2  
3 Interestingly, depletion of p15 resulted in decreased levels of both Nxf2 and Panx  
4 proteins (Figure 2C). Since the RNA levels of Nxf2 and Panx remained unchanged in  
5 the p15-depleted samples (Figure 2D), p15 likely affects the stability of Nxf2 and Panx  
6 proteins. The protein level of p15 was unaffected by Nxf2-KD, possibly because p15  
7 can bind to the other NXF proteins once Nxf2 is depleted (Figure 2C). De-silencing of  
8 the TEs and protein levels of Nxf2 and Panx could be rescued by expressing myc-p15  
9 protein in p15-depleted OSCs (Figure 2E and 2F). Thus, p15 is an essential partner  
10 protein for Nxf2 to transcriptionally regulate Piwi-piRNA-targeted TEs, by stabilizing  
11 protein levels of Panx and Nxf2.  
12  
13 Notably, the knockdown of Nxf2 resulted in a severe decrease in the level of Panx  
14 protein (Figures 2C and 2G). A similar finding was observed in Panx-KD, where the  
15 level of Nxf2 protein was greatly decreased (Figure 2G). In contrast, neither Nxf2- nor  
16 Panx-KD affected the level of Piwi protein. RNA levels of Piwi, Panx, and Nxf2 in KD  
17 samples were determined by qRT-PCR, which showed that the levels of Panx and Nxf2  
18 transcripts remained unchanged upon the knockdown of Nxf2 or Panx (Figure 2H).  
19 Destabilisation of Panx upon Nxf2-KD was also observed in the germ cells of the ovary  
20 (Figures S2G and S2H). Although the morphology of the ovary was not affected by the  
21 silencing of Nxf2 in the germline cells (Figures S2H), severe fertility defects were  
22 observed: flies with Nxf2 knockdown could lay eggs like the control flies, but none of  
23 them hatched (Figures S2I). This phenotype was similar to that observed in flies  
24 expressing Piwi only in ovarian somatic cells but not germ cells (Jin et al., 2013).

1 Additionally, TEs targeted by piRNAs in the germline were specifically de-silenced in  
2 Nxf2-depleted flies (Figures S2J). These results together show that the Panx-Nxf2-p15  
3 complex formation stabilizes the protein levels of Nxf2 and Panx (see also Figures 5  
4 and S5), and this is essential for TE silencing.

5

### 6 **Tethering of Nxf2 to nascent mRNA leads to co-transcriptional silencing**

7 We made use of reporter constructs to analyze the precise steps that the PPNP complex  
8 takes to mediate transcriptional silencing. First, we constructed reporter constructs  
9 whose transcripts are targeted by piRNAs derived from the *flam* locus, a prototype  
10 piRNA cluster (Brennecke et al., 2007; Post et al., 2014) (Figure S3A). The *luc* reporter  
11 gene containing *flam* fragments in sense orientation or in antisense orientation relative  
12 to the *luc* transcripts was transfected into OSCs; it was shown that only the antisense  
13 reporters were strongly silenced (Figure S3B-D). The antisense reporters were  
14 de-silenced in OSCs upon Piwi-KD (Figure S3E) or depletion of Piwi cofactors,  
15 including Panx and Nxf2 (Figure S3F), indicating that these factors were required for  
16 the co-transcriptional silencing in the Piwi-piRNA -targeted reporter system.

17

18 Previously, it was shown that the artificial recruitment of Panx can induce  
19 transcriptional silencing in *Drosophila* ovary (Sienski et al., 2015; Yu et al., 2015). For  
20 further functional analysis of Nxf2 in the Piwi-piRNA silencing pathway, we took  
21 advantage of the  $\lambda$ N-boxB tethering system, in which  $\lambda$ N fusion proteins are delivered  
22 to a reporter RNA *via* protein-RNA interaction (Baron-Benhamou et al., 2004). We  
23 established a tethering system using OSCs carrying a genome-integrated luciferase (*luc*)  
24 reporter driven by the ubiquitin promoter, which harbours 14 boxB sites in its intron

1 (Figure 3A). Expression of  $\lambda$ N-HA-tagged Nxf2 or Panx led to reporter silencing in a  
2 manner dependent on the  $\lambda$ N peptide fused to Nxf2 or Panx (Figures 3B and S4A).  
3 Silencing induced by tethered Panx or Nxf2 results in strongly reduced *luc* RNA levels  
4 (Figure 3C). Knockdown of Panx and p15 weakened the repression by the enforced  
5 tethering of Nxf2, showing that Nxf2 needs Panx and p15 for efficient repression  
6 (Figure 3D). Consistent with previous reports (Sienski et al., 2015; Yu et al., 2015), the  
7 tethering of Piwi to the reporter failed to induce silencing (Figures 3B and 3C).  
8  $\lambda$ N-HA-myc-tagged Piwi localized at the nucleus (Figure S4B), indicating that  
9  $\lambda$ N-HA-myc-tagged Piwi harbored piRNA in OSCs (Saito et al., 2010; Yashiro et al.,  
10 2018). Because we were able to demonstrate that Piwi, which is guided to the target  
11 reporter *via* loaded piRNA, represses its targets (Figure S3), it is likely that only  
12 piRNA-guided Piwi is able to recruit silencing machinery to the target (see also Figure  
13 S7Q).

14  
15 To rule out the possibility that  $\lambda$ N-Nxf2 interferes with the splicing of the reporter  
16 mRNA, we constructed a *luc* reporter with 10 boxB sites in the 3' untranslated region  
17 (Figure S4C). Tethering of Nxf2 to the reporter mRNA also led to silencing in a  $\lambda$ N  
18 peptide-dependent manner. To corroborate the results, we used an *in vivo*  
19 RNA-tethering system in the *Drosophila* ovary (Sienski et al., 2015). This assay builds  
20 on the  $\alpha$ -Tubulin promoter driving the ubiquitous expression of a *GFP* reporter, which  
21 harbours five boxB sites in its 3' untranslated region (Figure S4D). The expression of  
22  $\lambda$ N-Nxf2 with the MTD-Gal4 driver led to potent reporter silencing in germline cells  
23 but not in somatic cells of the ovary. Panx and Nxf2 proteins need to associate with

1 each other to ensure their stability (Figure 2G and S2G); therefore, it is likely that  
2 tethering of Panx results in the recruitment of Nxf2, and *vice versa*. These results  
3 indicate that the Nxf2–Panx complex is sufficient to induce co-transcriptional silencing,  
4 when targeted to nascent RNA.

5  
6 To dissect the mechanism of the observed co-transcriptional gene silencing in the  
7 tethering system in OSCs, we depleted the expression of genes known to be associated  
8 with Panx (Figure S1C) and involved in piRNA-directed transcriptional gene silencing.  
9 Depletion of Piwi or known Piwi cofactors [Gtsf1 (Donertas et al., 2013; Ohtani et al.,  
10 2013; Sienski et al., 2012) and Mael (Sienski et al., 2012)] instead had no impact on the  
11 Nxf2-mediated repression (Figures 3E and S4E). Thus, Nxf2 acts with Panx most likely  
12 downstream from Piwi, Gtsf1, and Mael.

13  
14 Furthermore, we examined the roles of chromatin-related factors in co-transcriptional  
15 silencing mediated by Piwi–piRNA complexes. Depletion of Eggless had no effect on  
16 the silencing by  $\lambda$ N-Nxf2 in the tethering system using OSCs (Figures 3F and S4F). In  
17 addition to Eggless-KD, H1-KD and HP1-KD also had no impact on the silencing by  
18 Piwi–piRNA and  $\lambda$ N-Nxf2 in the reporter system based on plasmids (Figures S3F and  
19 S4G-J). While this result is consistent with a report of a study using a plasmid-based  
20 reporter assay to detect Piwi-directed silencing in *Drosophila* ovary somatic sheet cells  
21 (Clark et al., 2017), it is at odds with previous reports demonstrating that the  
22 methyltransferase Eggless is required for Panx-mediated silencing using the tethering  
23 system in the *Drosophila* ovary (Sienski et al., 2015; Yu et al., 2015). These conflicting  
24 results are probably due to the different expression systems of  $\lambda$ N fusion proteins.  $\lambda$ N

1 fusion proteins are driven by MTD-Gal4 constitutively in the tethering system in the  
2 ovary, whereas they are expressed transiently by DNA transfection in the tethering  
3 system using OSCs. The tethering system in the ovary probably enables us to observe  
4 late phases of a suppressed state of the reporter gene. In contrast, transient expression of  
5  $\lambda$ N fusion proteins makes it possible to analyse the mechanism of transition from  
6 initiation to the fully suppressed state of the reporter gene in our tethering system using  
7 OSCs. The results of Eggless-KD upon tethering of  $\lambda$ N-Nxf2 suggest that the Nxf2–  
8 Panx pair elicits co-transcriptional repression prior to heterochromatin formation on  
9 TEs in the Piwi–piRNA pathway.

10

### 11 **Nxf2 triggers co-transcriptional repression prior to heterochromatin formation**

12 To elucidate the precise mechanism by which  $\lambda$ N-Nxf2 represses the reporter gene  
13 integrated in the genome, we examined the time course of silencing by  $\lambda$ N-Nxf2, which  
14 was expressed in OSCs by transient transfection of expression vector. The expression  
15 level of  $\lambda$ N-Nxf2 gradually decreased with a peak at 36 h post-transfection (hpt), and it  
16 had dropped below the detection limit at 96 hpt (Figure 4A). The luciferase activity  
17 reached its bottom at 48 hpt and remained suppressed at 96 hpt despite the absence of  
18  $\lambda$ N-Nxf2. Consistent with these observations, the level of Pol II association with the  
19 reporter gene decreased at 48 and 96 hpt (Figure 4B). Notably, no significant difference  
20 was observed in the occupancies of H1 and H3K9me3 at 48 hpt, despite  $\lambda$ N-Nxf2  
21 repressed the reporter gene (Figure 4A and 4C). This can be interpreted to mean that  
22 Nxf2-triggered co-transcriptional repression is independent of chromatin factors. By  
23 contrast, H1 and H3K9me3 accumulated on the reporter gene at 96 hpt (Figure 4C),

1 suggesting that heterochromatin is formed at this time point on the reporter gene in the  
2 absence of  $\lambda$ N-Nxf2, leading to continued silencing. To verify the role of  
3 heterochromatin formation in the gene silencing induced by  $\lambda$ N-Nxf2, we knocked  
4 down H1 or HP1a after expression of  $\lambda$ N-Nxf2. The effects of H1- and HP1a-KD on the  
5  $\lambda$ N-Nxf2-mediated silencing were negligible at 48 hpt (Figure 4D). To examine the  
6 roles of H1 and HP1a in the  $\lambda$ N-Nxf2-mediated silencing at the latter time point, we  
7 determined luciferase activity at 96 hpt of the  $\lambda$ N-Nxf2 expression vector followed by  
8 H1- and HP1a-KD. The depletion of H1 or HP1a partially restored luciferase activities  
9 upon tethering of  $\lambda$ N-Nxf2 at 96 hpt (Figure 4E). These findings together suggest  
10 that  $\lambda$ N-Nxf2 may initiate co-transcriptional repression prior to heterochromatin  
11 formation mediated by H1 and HP1a, which is required for maintaining the suppressed  
12 state of the reporter gene in the latter stage of silencing when little or no  $\lambda$ N-Nxf2 is  
13 present. In other words, the silencing mode mediated by tethered Nxf2 may switch from  
14 Nxf2–Panx-dependent to heterochromatin-dependent.

15

### 16 **The first LRR region of Nxf2 harbors RNA binding activity and is necessary for** 17 **piRNA-mediated transcriptional silencing**

18 To reveal the role of Nxf2 in the PPNP complex-mediated co-transcriptional silencing,  
19 we characterized the regions of Panx and Nxf2 proteins necessary for their function.  
20 This revealed that the middle region (300–399 aa) of Panx is necessary for its  
21 interaction with Nxf2 (Figures 5A and 5B) whereas its N-terminal region (1–169 aa)  
22 interacts with Piwi (Figure 5B). Rescue experiments and ectopic tethering experiments  
23 with the deletion mutants confirmed that both regions of Panx are indispensable for the



1 transcriptional regulation (Figures S5A and S5B). We also produced a series of Nxf2  
2 deletion mutants (Figure 5C) and found that the C-terminal UBA (ubiquitin-associated)  
3 domain of Nxf2 is necessary for interaction with Panx (Figure 5D). Although Nxf1 also  
4 harbours a UBA domain, we did not detect interaction between Nxf1 and Panx,  
5 indicating that Panx specifically recognises the UBA domain of Nxf2 (Figure S1I).  
6 These results suggest that the UBA domain of Nxf2 and middle region of Panx interact  
7 with each other, and N-terminal region of Panx is linked to Piwi.  
8  
9 Using the deletion mutants of Nxf2 (Figure 5C), we further performed rescue  
10 experiments by expressing each deletion mutant in Nxf2-depleted OSCs (Figure 5E).  
11 The expression of Panx protein could be stabilised not only by full-length Nxf2 but also  
12 by Nxf2- $\Delta$ LRR (leucine-rich repeat), showing that mutants that interact with Panx can  
13 rescue its protein level. However, Nxf2- $\Delta$ LRR, which associates with Panx and also  
14 Piwi (Figures 5D and S5C), could not recover the silencing of *mdg1* TE, suggesting that  
15 the LRR region of Nxf2 has an essential function other than formation of the PPNP  
16 complex. Consistent with this, piRNA-targeted reporters that were de-silenced upon  
17 depletion of Nxf2 (Figure S3F) could be rescued by full-length Nxf2, but not by  
18 Nxf2- $\Delta$ LRR (Figure S5D). We next investigated which of the Nxf2 mutants could  
19 induce silencing, when tethered to the reporter gene (Figure 5F). Interestingly, in  
20 addition to full-length Nxf2, Nxf2- $\Delta$ LRR mutant could induce silencing, indicating that  
21 the LRR region is dispensable once Nxf2 is tethered to the target gene. These results  
22 suggest that the LRR domain of Nxf2 is required to maintain recruitment of the PPNP  
23 complex to its targets.

24

1 It has been shown that Nxf1, the other NXF member in *Drosophila*, associates with  
2 bulk mRNA at its N-terminal RNA binding domain to induce its export (Viphakone et  
3 al., 2012). Additionally, a human homolog of Nxf2 associates with RNA through its  
4 N-terminal region (1–377 aa) (Herold et al., 2000). Meanwhile, both Nxf1 and Nxf2 in  
5 human use the N-terminal region to bind Alyref, a key factor for recruitment of Nxf1 to  
6 mRNA (Herold et al., 2000). To investigate the possible function of N-terminal region  
7 of *Drosophila* Nxf2 in piRNA pathway, we first performed knockdown of Ref1 (Alyref  
8 homolog in *Drosophila*) in OSCs, but could not detect de-silencing of *mdg1* TE (Figure  
9 S5E). We further performed an electrophoretic mobility shift assay (EMSA) to analyse  
10 the RNA binding activity of the N-terminal LRR domain of Nxf2 and observed an  
11 association of single-stranded RNA with the purified GST-tagged first LRR domain of  
12 Nxf2 (1–285 aa) (Figure 5G). These results suggest that Nxf2 requires LRR domain,  
13 which harbours RNA binding activity, in addition to the other domains necessary for  
14 formation of the PPNP complex, in order to tether the silencing complex to its target  
15 transcripts.

16

### 17 **Nxf2 directly interacts with piRNA-target TE transcripts in a Piwi-dependent** 18 **manner**

19 The RNA-binding activity of Nxf2 prompted us to elucidate the mechanistic details of  
20 how Nxf2 is recruited to TE transcripts. We investigated cellular transcripts associated  
21 with Nxf2 and/or Piwi via UV crosslinking and immunoprecipitation (CLIP) assay  
22 (Flynn et al., 2015; Van Nostrand et al., 2016). We first raised a stable cell line of OSCs  
23 that express siRNA-resistant myc–Nxf2, since our Nxf2 antibody is not suitable for  
24 immunoprecipitation. The expression level of myc–Nxf2 is slightly higher than that of

1 endogenous Nxf2, and Nxf2-siRNA specifically depletes endogenous Nxf2 (Figure  
2 S6A). myc-Nxf2 forms a complex identified using antibody against endogenous Panx  
3 (Figure S1C) and is capable of silencing *mdg1* TEs (Figures S6B and S6C). We  
4 therefore used this stable line to analyze the RNA population targeted by Nxf2.

5  
6 We generated CLIP libraries using RNA isolated from myc-Nxf2 or Piwi  
7 immunoprecipitants. Immunoprecipitants were run on standard protein gels and  
8 transferred to nitrocellulose membranes, and a region 50 kDa above the protein size was  
9 excised for RNA isolation (Figure S6D), referring to the eCLIP method (Van Nostrand  
10 et al., 2016). The same region was excised for the input sample in order to generate a  
11 size-matched input (SMInput) library, which enables efficient background  
12 normalization and then leads to a more accurate measure of the enrichment of CLIP  
13 signals (Van Nostrand et al., 2016). Each CLIP experiment was performed in two  
14 biological replicates, and the reads were merged after checking the correlation of read  
15 counts of annotated peaks (Figure S6E). We first performed CLIP assay of myc-Nxf2  
16 protein in UV-crosslinked and non-UV-crosslinked samples, to examine whether RNA  
17 associated with myc-Nxf2 could be captured by this assay. We observed a significant  
18 decrease in the amount of CLIP tags obtained for piRNA-targeted TE transcripts when  
19 CLIP was performed on non-UV-crosslinked samples (Figure S6F), indicating that we  
20 can specifically capture target RNA by the myc-Nxf2 CLIP assay.

21  
22 Based on these results, we further performed myc-Nxf2 CLIP assay upon control  
23 (EGFP) or Piwi knockdown. Endogenous Nxf2 was also depleted, in order to increase  
24 the ratio of functioning myc-Nxf2. We first compared the enrichment of obtained CLIP

1 tags to that of SMInput control, for the reads mapped in the sense or antisense direction  
2 of TEs (Figure 6A). This revealed that there was some fraction of TEs with enrichment  
3 of CLIP tags mapped in the sense direction, whereas this enrichment was not observed  
4 for the reads mapped in the antisense direction (Figure 6A). Additionally, we plotted the  
5 TEs targeted by Piwi-piRNA complexes, which showed that TEs with enriched CLIP  
6 tags were the targets of piRNAs (Figures 6A). Notably, the specific enrichment of myc-  
7 Nxf2 CLIP tags on piRNA-targeted TEs was lost upon the knockdown of Piwi (Figures  
8 6B and S6G, see also Figure 6D), indicating that Piwi is required for Nxf2 to  
9 specifically associate with piRNA-targeted transcripts.

10

11 To further investigate the relationship between RNA targeting of Nxf2 and Piwi, we  
12 performed Piwi CLIP assay. As in the case of myc-Nxf2 CLIP, we observed the  
13 specific enrichment of CLIP tags against SMInput, specifically for those mapped in the  
14 sense direction of piRNA-targeted TEs (Figures 6C and 6D). We compared the  
15 expression level of TEs under Piwi-, Panx-, and Nxf2-KD, and also sequenced piRNA  
16 reads from Piwi-immunoprecipitant (Figure 6E). This revealed that TEs with enriched  
17 myc-Nxf2 and Piwi CLIP tags were de-silenced upon the depletion of Piwi, Panx, or  
18 Nxf2, and they were also targeted by piRNAs. A density plot of myc-Nxf2 and Piwi  
19 CLIP tags, along with piRNA reads, showed that myc-Nxf2 and Piwi CLIP tags had  
20 similar distributions, while piRNAs that can target wider regions of TEs were produced  
21 (Figure 6F). This indicates the possibility that specific piRNAs can silence certain  
22 transposons more efficiently than others. Since CLIP peaks tend to be detected on LTR  
23 regions or 5' regions of transposons, piRNAs may silence their targets as soon as they  
24 are transcribed and therefore downstream RNAs may not be produced. These results,

1 together with the finding that PPNP association is essential in order to stabilize the  
2 protein level of Nxf2 (Figure 2), suggest that the PPNP complex is recruited to nascent  
3 transcripts by base-pairing of Piwi-associated piRNAs with targets, and further enforced  
4 through the RNA binding activity of Nxf2.  
5

## 1 Discussion

2 Here, we propose a model in which the engagement of the PPNP complex with nascent  
3 TE transcripts initiates co-transcriptional silencing prior to heterochromatin formation  
4 (Figure S6H). Although the heterochromatin factors are not required for the initial step  
5 of the silencing (Figure 4), they play a significant role in maintenance of the repressed  
6 status in the later stages of TE silencing. Because the depletion of Piwi activity rapidly  
7 results in the de-repression of TEs (Figure 1), this also suggests that silencing initiation  
8 and heterochromatin formation undergo continuous cycling to enforce a silenced state  
9 of TEs. An important issue to be clarified next is the mechanism by which the PPNP  
10 complex initiates the silencing of TEs.

11  
12 In *C. elegans*, NRDE-2 (nuclear RNAi defective-2) associates with the Argonaute  
13 protein NRDE-3 in the nucleus and is recruited by the NRDE-3/siRNA complex to  
14 nascent transcripts. This complex inhibits Pol II during the elongation, and directs the  
15 accumulation of Pol II at genomic loci targeted by RNAi (Guang et al., 2010). We  
16 investigated whether  $\lambda$ N-Nxf2 directs the accumulation of Pol II at boxB sites in the  
17 co-transcriptional silencing (Figure S7A-C). Although the time course of Pol II  
18 occupancy upon  $\lambda$ N-Nxf2 was examined by ChIP-qPCR at the boxB sites, we could not  
19 observe any accumulation of Pol II along the reporter gene.

20  
21 Recently, it was reported that Pol II-associated proteins, PAF1 and RTF1, antagonize  
22 Piwi-directed silencing (Clark et al., 2017), which are factors involved in the  
23 modulation of promoter release, elongation, and termination of Pol II (Chen et al., 2015;  
24 Van Oss et al., 2017; Vos et al., 2018). The Panx-Nxf2-p15 complex might interfere

1 with Pol II *via* the PAF1 complex, considering that fission yeast PAF1 represses  
2 AGO1/siRNA-directed silencing (Kowalik et al., 2015). Although we examined the  
3 effect of PAF1 and RTF1 on the co-transcriptional silencing, PAF1 and RTF1 do not  
4 appear to be involved in the co-transcriptional silencing mediated by  $\lambda$ N-Nxf2 (Figures  
5 S7D-I). These results suggest that Pol II regulation by the PPNP complex differs from  
6 that of the small RNA-mediated Pol II regulation model proposed previously. It may be  
7 necessary to identify key factors involved in this regulation, possibly by performing  
8 proteome analysis of the unknown factors tethered to our reporter recruitment system.

9  
10 We found a decrease in the active histone H3K4me3 marks on the reporter gene even at  
11 an earlier time point (48 hpt) at which the level of H3K9me3 marks remained low  
12 (Figure S7J and Figure 4C). Two reports about H3K4 methylation in Piwi-mediated  
13 silencing have been published. The level of H3K4 methylation on TEs is increased upon  
14 Piwi-KD (Klenov et al., 2014). The expression of artificial piRNAs that target a reporter  
15 locus induced transcriptional silencing associated with a decrease in the active  
16 H3K4-methylation marks (Le Thomas et al., 2013). In addition, the depletion of LSD1,  
17 which removes H3K4-methylation marks from promoters, had significant effects on the  
18 ability of Panx to repress the reporter gene (Yu et al., 2015). Therefore, we performed  
19 LSD1-KD and examined the effect of LSD1 on co-transcriptional silencing by the  
20 enforced tethering of Nxf2. However, the depletion of LSD1 had a limited impact on  
21 the silencing, whereas the level of *mdg1* was increased 27-fold upon LSD1-KD (Figures  
22 S7K-O). These findings together suggest that the decrease observed in H3K4me3 levels  
23 at 48 hpt in the tethering assay may not have been due to LSD1.

24

1 Nxf2 is a member of the NXF family, most members of which are known to associate  
2 with p15 (Herold et al., 2001). Although p15 interaction is essential for transcriptional  
3 silencing by Nxf2 (Figure 2), its molecular function remains to be revealed. In the case  
4 of Nxf1, its heterodimerization with p15 is essential for binding to NPC (Levesque et al.,  
5 2001; Wiegand et al., 2002). Considering that perinuclear chromatin positioning  
6 correlates with silenced expression and histone modifications (Harr et al., 2016), and  
7 that piRNAs are loaded onto Piwi at the Yb-body located near the nuclear membrane  
8 (Saito et al., 2010), it is interesting to analyze whether Piwi-piRNA silencing occurs  
9 near the nuclear periphery, and whether the association of p15 with Nxf2 would affect  
10 the localization of the Piwi-piRNA target chromatin in the nucleus. In addition, the  
11 NXF family is highly conserved in various species including humans (Bjork and  
12 Wieslander, 2014; Izaurralde, 2002; Stutz and Izaurralde, 2003; Wickramasinghe and  
13 Laskey, 2015). In the case of mouse, the expression of Nxf2 and Nxf3 is specific to the  
14 testis, instead of the ovary as in *Drosophila*, and male meiotic defects have been  
15 reported in mutant animals (Pan et al., 2009; Zhou et al., 2013). Taking these findings  
16 together with the fact that the mouse Piwi-piRNA pathway functions in testis rather  
17 than in ovary, it is possible that Nxf2 or other conserved NXF variants possess  
18 functions similar to *Drosophila* Nxf2 in mammals. In addition, Panx is not conserved in  
19 mammals (Sienski et al., 2015; Yu et al., 2015), so future studies of the proteins  
20 interacting with mouse Nxf2 may lead to the identification of a factor that functions in  
21 the place of Panx in mammals.

22

23 Our analysis revealed that PPNP complex plays a key role in co-transcriptional  
24 silencing in the Piwi-piRNA pathway by inducing multi-step transcriptional regulation



1 (Figure S6H). Nxf2 is the core factor of this complex, and our results suggest that the  
2 nuclear export factor variant has been co-opted to repress TEs in the Piwi-piRNA  
3 pathway. We speculate that the co-option of Nxf2 into TE silencing is not coincidental  
4 but may reflect previous TE adaptation to exploit cellular mRNA transport pathways  
5 promoting the export of TE transcripts and replication/transposition (Checkley et al.,  
6 2013). Why is it necessary for Piwi to use the RNA binding activity of Nxf2 to silence  
7 their targets? Piwi, as a member of the Argonaute family, is thought to search for targets  
8 through random interactions between Piwi-piRNA and transcripts in the ocean of the  
9 transcriptome, many of which likely show partial complementarity with Piwi-loaded  
10 piRNAs (Klein et al., 2017). To distinguish “scanning Piwi” and “target-engaged Piwi,”  
11 the silencing pathway may need an engaged-in system to repress only targets and avoid  
12 unnecessary silencing of other cellular transcripts. It is possible that Nxf2 plays a role in  
13 supporting the association of Piwi that has found its *bona fide* targets (Figure S7P).  
14 Panx preferentially associates with Piwi, which loads piRNAs targeting TEs (Sienski et  
15 al., 2015), suggesting that there may be a system for Panx-Nxf2 to form the PPNP  
16 complex, specifically with Piwi that is engaged with its target TEs. Our CLIP analysis  
17 shows that Nxf2 cannot associate with target TEs without the activity of Piwi (Figure 6),  
18 indicating that the Panx-Nxf2-p15 complex itself does not recognize target transcripts,  
19 but rather recognizes target-engaged Piwi. In line with this, while piRNA-targeted Piwi  
20 can repress the reporter gene (Figure S3),  $\lambda$ N-tethered Piwi cannot (Figure 3). This may  
21 be due to the Panx-Nxf2-p15 complex recognizing only piRNA-directed target-engaged  
22 Piwi, but not scanning or  $\lambda$ N-tethered Piwi (Figures S7P and S7Q). Further studies will  
23 be necessary to elucidate the precise mechanism by which the Panx-Nxf2-p15 complex  
24 selectively recognizes only the “target-engaged Piwi” and forms a PPNP complex to

1 induce silencing of its targets.

2

## 1 **Acknowledgements**

2 We thank Wataru Ito for experimental support and critical discussions. We also thank  
3 Julius Brennecke for sharing plasmids; Kazumichi Nishida, Ryo Ohnishi, and Tatsuki  
4 Kinoshita for sharing protocols; and Soichiro Yamanaka for critical reading of the paper.  
5 This work was supported by funding from MEXT (17K08644) and Kato Memorial  
6 Bioscience Foundation to K.M.; from MEXT (15H05583, 17H05603, 18H02421, and  
7 19H05268), Senri Life Science Foundation, NOVARTIS Foundation (Japan) for the  
8 Promotion of Science, and the Naito Foundation to Y.W.I.; from MEXT (17H05610) to  
9 S.A.; from Takeda Science Foundation to T.N.; and from MEXT (25221003) to H.S.

10

## 11 **Author Contributions**

12 K.M. and Y.W.I. designed and performed most of the experiments with H.I., A.M., and  
13 A.S. S.K. and K.S. generated mutant flies for tethering assays, S.A. and T.N. performed  
14 LC-MS/MS analysis, and S.S. and M.C.S. generated Eggless antibody. Y.W.I. and H.S.  
15 conceived the study, and K.M., Y.W.I., and H.S. wrote the paper with input from the  
16 other authors.

17

## 18 **Declaration of Interests**

19 The authors declare no competing financial interests. Correspondence and requests for  
20 materials should be addressed to Y.W.I ([iwasaki@keio.jp](mailto:iwasaki@keio.jp)) and H.S. ([awa403@keio.jp](mailto:awa403@keio.jp)).

## 1 **References**

- 2 Baron-Benhamou, J., Gehring, N.H., Kulozik, A.E., and Hentze, M.W. (2004). Using  
3 the lambdaN peptide to tether proteins to RNAs. *Methods in molecular biology* (Clifton,  
4 NJ) *257*, 135-154.
- 5 Bjork, P., and Wieslander, L. (2014). Mechanisms of mRNA export. *Seminars in cell &*  
6 *developmental biology* *32*, 47-54.
- 7 Brennecke, J., Aravin, A.A., Stark, A., Dus, M., Kellis, M., Sachidanandam, R., and  
8 Hannon, G.J. (2007). Discrete small RNA-generating loci as master regulators of  
9 transposon activity in *Drosophila*. *Cell* *128*, 1089-1103.
- 10 Brower-Toland, B., Findley, S.D., Jiang, L., Liu, L., Yin, H., Dus, M., Zhou, P., Elgin,  
11 S.C.R., and Lin, H.F. (2007). *Drosophila* PIWI associates with chromatin and interacts  
12 directly with HP1a. *Genes & development* *21*, 2300-2311.
- 13 Carmell, M.A., Girard, A., van de Kant, H.J., Bourc'his, D., Bestor, T.H., de Rooij,  
14 D.G., and Hannon, G.J. (2007). MIWI2 is essential for spermatogenesis and repression  
15 of transposons in the mouse male germline. *Dev Cell* *12*, 503-514.
- 16 Checkley, M.A., Mitchell, J.A., Eizenstat, L.D., Lockett, S.J., and Garfinkel, D.J.  
17 (2013). Ty1 gag enhances the stability and nuclear export of Ty1 mRNA. *Traffic* *14*,  
18 57-69.
- 19 Chen, F.X., Woodfin, A.R., Gardini, A., Rickels, R.A., Marshall, S.A., Smith, E.R.,  
20 Shiekhatter, R., and Shilatifard, A. (2015). PAF1, a Molecular Regulator of  
21 Promoter-Proximal Pausing by RNA Polymerase II. *Cell* *162*, 1003-1015.
- 22 Chuong, E.B., Elde, N.C., and Feschotte, C. (2017). Regulatory activities of  
23 transposable elements: from conflicts to benefits. *Nature reviews Genetics* *18*, 71-86.
- 24 Clark, J.P., Rahman, R., Yang, N., Yang, L.H., and Lau, N.C. (2017). *Drosophila* PAF1  
25 Modulates PIWI/piRNA Silencing Capacity. *Curr Biol* *27*, 2718-2726.e2714.
- 26 Cox, D.N., Chao, A., Baker, J., Chang, L., Qiao, D., and Lin, H. (1998). A novel class  
27 of evolutionarily conserved genes defined by piwi are essential for stem cell  
28 self-renewal. *Genes & development* *12*, 3715-3727.
- 29 Czech, B., Preall, J.B., McGinn, J., and Hannon, G.J. (2013). A transcriptome-wide  
30 RNAi screen in the *Drosophila* ovary reveals factors of the germline piRNA pathway.  
31 *Mol Cell* *50*, 749-761.
- 32 Donertas, D., Sienski, G., and Brennecke, J. (2013). *Drosophila* Gtsfl is an essential  
33 component of the Piwi-mediated transcriptional silencing complex. *Genes &*

- 1 development 27, 1693-1705.
- 2 Ernst, C., Odom, D.T., and Kutter, C. (2017). The emergence of piRNAs against  
3 transposon invasion to preserve mammalian genome integrity. *Nature communications*  
4 8, 1411.
- 5 Flynn, R.A., Martin, L., Spitale, R.C., Do, B.T., Sagan, S.M., Zarnegar, B., Qu, K.,  
6 Khavari, P.A., Quake, S.R., Sarnow, P., *et al.* (2015). Dissecting noncoding and  
7 pathogen RNA-protein interactomes. *RNA (New York, NY)* 21, 135-143.
- 8 Fribourg, S., Braun, I.C., Izaurralde, E., and Conti, E. (2001). Structural basis for the  
9 recognition of a nucleoporin FG repeat by the NTF2-like domain of the TAP/p15  
10 mRNA nuclear export factor. *Mol Cell* 8, 645-656.
- 11 Gramates, L.S., Marygold, S.J., Santos, G.D., Urbano, J.M., Antonazzo, G., Matthews,  
12 B.B., Rey, A.J., Tabone, C.J., Crosby, M.A., Emmert, D.B., *et al.* (2017). FlyBase at  
13 25: looking to the future. *Nucleic acids research* 45, D663-d671.
- 14 Guang, S., Bochner, A.F., Burkhart, K.B., Burton, N., Pavelec, D.M., and Kennedy, S.  
15 (2010). Small regulatory RNAs inhibit RNA polymerase II during the elongation phase  
16 of transcription. *Nature* 465, 1097-1101.
- 17 Gunawardane, L.S., Saito, K., Nishida, K.M., Miyoshi, K., Kawamura, Y., Nagami, T.,  
18 Siomi, H., and Siomi, M.C. (2007). A slicer-mediated mechanism for repeat-associated  
19 siRNA 5' end formation in *Drosophila*. *Science (New York, NY)* 315, 1587-1590.
- 20 Han, B.W., Wang, W., Li, C., Weng, Z., and Zamore, P.D. (2015). Noncoding RNA.  
21 piRNA-guided transposon cleavage initiates Zucchini-dependent, phased piRNA  
22 production. *Science (New York, NY)* 348, 817-821.
- 23 Han, J.S., and Boeke, J.D. (2005). LINE-1 retrotransposons: modulators of quantity and  
24 quality of mammalian gene expression? *BioEssays : news and reviews in molecular,*  
25 *cellular and developmental biology* 27, 775-784.
- 26 Handler, D., Meixner, K., Pizka, M., Lauss, K., Schmied, C., Gruber, F.S., and  
27 Brennecke, J. (2013). The genetic makeup of the *Drosophila* piRNA pathway. *Mol Cell*  
28 50, 762-777.
- 29 Harr, J.C., Gonzalez-Sandoval, A., and Gasser, S.M. (2016). Histones and histone  
30 modifications in perinuclear chromatin anchoring: from yeast to man. *EMBO Rep* 17,  
31 139-155.
- 32 Herold, A., Klymenko, T., and Izaurralde, E. (2001). NXF1/p15 heterodimers are  
33 essential for mRNA nuclear export in *Drosophila*. *RNA (New York, NY)* 7, 1768-1780.

- 1 Herold, A., Suyama, M., Rodrigues, J.P., Braun, I.C., Kutay, U., Carmo-Fonseca, M.,  
2 Bork, P., and Izaurralde, E. (2000). TAP (NXF1) belongs to a multigene family of  
3 putative RNA export factors with a conserved modular architecture. *Mol Cell Biol* *20*,  
4 8996-9008.
- 5 Herold, A., Teixeira, L., and Izaurralde, E. (2003). Genome-wide analysis of nuclear  
6 mRNA export pathways in *Drosophila*. *The EMBO journal* *22*, 2472-2483.
- 7 Homolka, D., Pandey, R.R., Goriaux, C., Brasset, E., Vaury, C., Sachidanandam, R.,  
8 Fauvarque, M.O., and Pillai, R.S. (2015). PIWI Slicing and RNA Elements in  
9 Precursors Instruct Directional Primary piRNA Biogenesis. *Cell reports* *12*, 418-428.
- 10 Houwing, S., Kamminga, L.M., Berezikov, E., Cronembold, D., Girard, A., van den  
11 Elst, H., Filippov, D.V., Blaser, H., Raz, E., Moens, C.B., *et al.* (2007). A role for Piwi  
12 and piRNAs in germ cell maintenance and transposon silencing in Zebrafish. *Cell* *129*,  
13 69-82.
- 14 Huang, X.A., Yin, H., Sweeney, S., Raha, D., Snyder, M., and Lin, H. (2013). A major  
15 epigenetic programming mechanism guided by piRNAs. *Dev Cell* *24*, 502-516.
- 16 Iwasaki, Y.W., Murano, K., Ishizu, H., Shibuya, A., Iyoda, Y., Siomi, M.C., Siomi, H.,  
17 and Saito, K. (2016). Piwi Modulates Chromatin Accessibility by Regulating Multiple  
18 Factors Including Histone H1 to Repress Transposons. *Mol Cell* *63*, 408-419.
- 19 Iwasaki, Y.W., Siomi, M.C., and Siomi, H. (2015). PIWI-Interacting RNA: Its  
20 Biogenesis and Functions. *Annu Rev Biochem* *84*, 405-433.
- 21 Izaurralde, E. (2002). A novel family of nuclear transport receptors mediates the export  
22 of messenger RNA to the cytoplasm. *Eur J Cell Biol* *81*, 577-584.
- 23 Jin, Z., Flynt, A.S., and Lai, E.C. (2013). *Drosophila* piwi mutants exhibit germline  
24 stem cell tumors that are sustained by elevated Dpp signaling. *Curr Biol* *23*, 1442-1448.
- 25 Kerkow, D.E., Carmel, A.B., Menichelli, E., Ambrus, G., Hills, R.D., Jr., Gerace, L.,  
26 and Williamson, J.R. (2012). The structure of the NXF2/NXT1 heterodimeric complex  
27 reveals the combined specificity and versatility of the NTF2-like fold. *Journal of*  
28 *molecular biology* *415*, 649-665.
- 29 Klein, M., Chandradoss, S.D., Depken, M., and Joo, C. (2017). Why Argonaute is  
30 needed to make microRNA target search fast and reliable. *Seminars in cell &*  
31 *developmental biology* *65*, 20-28.
- 32 Klenov, M.S., Lavrov, S.A., Korbut, A.P., Stolyarenko, A.D., Yakushev, E.Y., Reuter,  
33 M., Pillai, R.S., and Gvozdev, V.A. (2014). Impact of nuclear Piwi elimination on

- 1 chromatin state in *Drosophila melanogaster* ovaries. *Nucleic acids research* *42*,  
2 6208-6218.
- 3 Kowalik, K.M., Shimada, Y., Flury, V., Stadler, M.B., Batki, J., and Buhler, M. (2015).  
4 The Paf1 complex represses small-RNA-mediated epigenetic gene silencing. *Nature*  
5 *520*, 248-252.
- 6 Le Thomas, A., Rogers, A.K., Webster, A., Marinov, G.K., Liao, S.E., Perkins, E.M.,  
7 Hur, J.K., Aravin, A.A., and Toth, K.F. (2013). Piwi induces piRNA-guided  
8 transcriptional silencing and establishment of a repressive chromatin state. *Genes &*  
9 *development* *27*, 390-399.
- 10 Levesque, L., Guzik, B., Guan, T., Coyle, J., Black, B.E., Rekosh, D., Hammarskjold,  
11 M.L., and Paschal, B.M. (2001). RNA export mediated by tap involves  
12 NXT1-dependent interactions with the nuclear pore complex. *The Journal of biological*  
13 *chemistry* *276*, 44953-44962.
- 14 Lin, H., and Spradling, A.C. (1997). A novel group of pumilio mutations affects the  
15 asymmetric division of germline stem cells in the *Drosophila* ovary. *Development*  
16 (Cambridge, England) *124*, 2463-2476.
- 17 Mohn, F., Handler, D., and Brennecke, J. (2015). Noncoding RNA. piRNA-guided  
18 slicing specifies transcripts for Zucchini-dependent, phased piRNA biogenesis. *Science*  
19 (New York, NY) *348*, 812-817.
- 20 Muerdter, F., Guzzardo, P.M., Gillis, J., Luo, Y., Yu, Y., Chen, C., Fekete, R., and  
21 Hannon, G.J. (2013). A genome-wide RNAi screen draws a genetic framework for  
22 transposon control and primary piRNA biogenesis in *Drosophila*. *Mol Cell* *50*, 736-748.
- 23 Ohtani, H., Iwasaki, Y.W., Shibuya, A., Siomi, H., Siomi, M.C., and Saito, K. (2013).  
24 DmGTSF1 is necessary for Piwi-piRISC-mediated transcriptional transposon silencing  
25 in the *Drosophila* ovary. *Genes & development* *27*, 1656-1661.
- 26 Ozata, D.M., Gainetdinov, I., Zoch, A., O'Carroll, D., and Zamore, P.D. (2019).  
27 PIWI-interacting RNAs: small RNAs with big functions. *Nature reviews Genetics* *20*,  
28 89-108.
- 29 Pan, J., Eckardt, S., Leu, N.A., Buffone, M.G., Zhou, J., Gerton, G.L., McLaughlin, K.J.,  
30 and Wang, P.J. (2009). Inactivation of Nxf2 causes defects in male meiosis and  
31 age-dependent depletion of spermatogonia. *Dev Biol* *330*, 167-174.
- 32 Post, C., Clark, J.P., Sytnikova, Y.A., Chirn, G.W., and Lau, N.C. (2014). The capacity  
33 of target silencing by *Drosophila* PIWI and piRNAs. *RNA (New York, NY)* *20*,

- 1 1977-1986.
- 2 Rozhkov, N.V., Hammell, M., and Hannon, G.J. (2013). Multiple roles for Piwi in  
3 silencing *Drosophila* transposons. *Genes & development* 27, 400-412.
- 4 Saito, K., Inagaki, S., Mituyama, T., Kawamura, Y., Ono, Y., Sakota, E., Kotani, H.,  
5 Asai, K., Siomi, H., and Siomi, M.C. (2009). A regulatory circuit for piwi by the large  
6 Maf gene traffic jam in *Drosophila*. *Nature* 461, 1296-1299.
- 7 Saito, K., Ishizu, H., Komai, M., Kotani, H., Kawamura, Y., Nishida, K.M., Siomi, H.,  
8 and Siomi, M.C. (2010). Roles for the Yb body components Armitage and Yb in  
9 primary piRNA biogenesis in *Drosophila*. *Genes & development* 24, 2493-2498.
- 10 Sienski, G., Batki, J., Senti, K.A., Donertas, D., Tirian, L., Meixner, K., and Brennecke,  
11 J. (2015). Silencio/CG9754 connects the Piwi-piRNA complex to the cellular  
12 heterochromatin machinery. *Genes & development* 29, 2258-2271.
- 13 Sienski, G., Donertas, D., and Brennecke, J. (2012). Transcriptional silencing of  
14 transposons by Piwi and maelstrom and its impact on chromatin state and gene  
15 expression. *Cell* 151, 964-980.
- 16 Stutz, F., and Izaurralde, E. (2003). The interplay of nuclear mRNP assembly, mRNA  
17 surveillance and export. *Trends in cell biology* 13, 319-327.
- 18 Van Nostrand, E.L., Pratt, G.A., Shishkin, A.A., Gelboin-Burkhart, C., Fang, M.Y.,  
19 Sundararaman, B., Blue, S.M., Nguyen, T.B., Surka, C., Elkins, K., *et al.* (2016).  
20 Robust transcriptome-wide discovery of RNA-binding protein binding sites with  
21 enhanced CLIP (eCLIP). *Nature methods* 13, 508-514.
- 22 Van Oss, S.B., Cucinotta, C.E., and Arndt, K.M. (2017). Emerging Insights into the  
23 Roles of the Paf1 Complex in Gene Regulation. *Trends Biochem Sci* 42, 788-798.
- 24 Viphakone, N., Hautbergue, G.M., Walsh, M., Chang, C.T., Holland, A., Folco, E.G.,  
25 Reed, R., and Wilson, S.A. (2012). TREX exposes the RNA-binding domain of Nxf1 to  
26 enable mRNA export. *Nature communications* 3, 1006.
- 27 Vos, S.M., Farnung, L., Boehning, M., Wigge, C., Linden, A., Urlaub, H., and Cramer,  
28 P. (2018). Structure of activated transcription complex Pol II-DSIF-PAF-SPT6. *Nature*  
29 560, 607-612.
- 30 Wang, S.H., and Elgin, S.C. (2011). *Drosophila* Piwi functions downstream of piRNA  
31 production mediating a chromatin-based transposon silencing mechanism in female  
32 germ line. *Proceedings of the National Academy of Sciences of the United States of*  
33 *America* 108, 21164-21169.



- 1 Wickramasinghe, V.O., and Laskey, R.A. (2015). Control of mammalian gene  
2 expression by selective mRNA export. *Nature reviews Molecular cell biology* 16,  
3 431-442.
- 4 Wiegand, H.L., Coburn, G.A., Zeng, Y., Kang, Y., Bogerd, H.P., and Cullen, B.R.  
5 (2002). Formation of Tap/NXT1 heterodimers activates Tap-dependent nuclear mRNA  
6 export by enhancing recruitment to nuclear pore complexes. *Mol Cell Biol* 22, 245-256.
- 7 Wilkie, G.S., Zimyanin, V., Kirby, R., Korey, C., Francis-Lang, H., Van Vactor, D., and  
8 Davis, I. (2001). Small bristles, the *Drosophila* ortholog of NXF-1, is essential for  
9 mRNA export throughout development. *RNA (New York, NY)* 7, 1781-1792.
- 10 Yashiro, R., Murota, Y., Nishida, K.M., Yamashiro, H., Fujii, K., Ogai, A., Yamanaka,  
11 S., Negishi, L., Siomi, H., and Siomi, M.C. (2018). Piwi Nuclear Localization and Its  
12 Regulatory Mechanism in *Drosophila* Ovarian Somatic Cells. *Cell reports* 23,  
13 3647-3657.
- 14 Yu, Y., Gu, J., Jin, Y., Luo, Y., Preall, J.B., Ma, J., Czech, B., and Hannon, G.J. (2015).  
15 Panoramix enforces piRNA-dependent cotranscriptional silencing. *Science (New York,*  
16 *NY)* 350, 339-342.
- 17 Zhou, J., McCarrey, J.R., and Wang, P.J. (2013). A 1.1-Mb segmental deletion on the X  
18 chromosome causes meiotic failure in male mice. *Biol Reprod* 88, 159.
- 19

## 1 **Figure Legends**

### 2 **Figure 1. Nxf2 is required for Piwi-piRNA-mediated TE silencing in OSCs.**

- 3 **(A)** Immunoprecipitation (IP) from siRNA-transfected OSC lysate using anti-Panx  
4 antibody, followed by silver staining. Protein bands indicated by red arrows were  
5 identified by mass spectrometry analyses (see also **Table S1**). Mouse immunoglobulin  
6 G (IgG) (n.i.) was used for control IP.
- 7 **(B)** IP from OSC lysate using anti-Piwi antibody, followed by Western blotting. Cyto:  
8 cytoplasmic fraction of OSCs. Nuc: nuclear fraction of OSCs.
- 9 **(C)** Scatterplot of RPKM values for TEs in EGFP- (control), Panx-, or Nxf2-KD  
10 samples, based on RNA-seq. TEs for which the expression level differed from that of  
11 the control by more than tenfold in Piwi-KD (Piwi-piRNA-targeted TEs) are plotted in  
12 orange. Both x- and y-axis is a log<sub>10</sub> scale.
- 13 **(D)** Boxplots showing fold changes in the expression of Piwi-piRNA-targeted and  
14 un-targeted TEs based on RNA-seq upon the indicated KD. Piwi-piRNA-targeted TEs  
15 are as defined previously (Iwasaki et al., 2016). Boxplot whiskers show maxima and  
16 minima. *P*-values were calculated by Wilcoxon rank-sum test, and the y-axis is a log<sub>2</sub>  
17 scale.
- 18 **(E)** Meta-plot and heat map indicating H3K9me<sub>3</sub> levels within 15 kb of the Piwi-  
19 piRNA-targeted TE insertion are shown for OSCs with the indicated KD. Heat map is  
20 sorted by the decrease of H3K9me<sub>3</sub> levels in Piwi-KD against EGFP-KD.
- 21 **(F)** Density plots for normalised H3K9me<sub>3</sub> ChIP-seq signals over the consensus  
22 sequence from *mdg1*, *gypsy* (targeted by Piwi-piRNA, orange), and *roo* (not targeted by  
23 Piwi-piRNA, blue) TEs in EGFP-, Piwi-, Panx- and Nxf2-KD OSCs.
- 24 **(G)** Boxplots as in **(D)** showing fold changes in the H3K9me<sub>3</sub> levels of Piwi-

1 piRNA-targeted and un-targeted TEs upon the indicated KD.

2 **(H)** Northern blotting for *Idefix*-piRNA, *traffic jam (tj)*-piRNA, and esiRNA *sl-1*

3 (control) on total RNA isolated from OSCs with the indicated KD.

4

5 **Figure 2. Panx-Nxf2-p15 complex formation is essential for the protein stability of**

6 **Panx and Nxf2.**

7 **(A)** Western blot (WB) showing Nxf2 protein levels in the complex immunoprecipitated

8 from OSCs expressing either myc-EGFP or myc-p15, using myc antibody. Mouse

9 immunoglobulin G (IgG) (n.i.) was used for control immunoprecipitation.

10 **(B)** RNA levels of *mdg1* and *roo* were quantified by qRT-PCR upon depletion of EGFP

11 (control), p15, or Nxf2. Error bars indicate SD (n=3). Note that KD was performed for 2

12 days with a single siRNA transfection for this experiment.

13 **(C)** WB showing p15, Nxf2, Panx, Piwi, and Tubulin (loading control) protein levels

14 upon EGFP (control)-, p15-, or Nxf2-KD.

15 **(D)** RNA levels of Panx and Nxf2 were quantified by qRT-PCR upon depletion of

16 EGFP (control), p15, or Nxf2. Error bars indicate SD (n=3).

17 **(E)** myc-EGFP or myc-p15 was expressed in Luc- (control) or p15-depleted OSCs, and

18 *mdg1* expression levels were monitored by qRT-PCR (left panel). Expression values are

19 normalised by the expression of *RP49*. Error bars indicate SD (n=3). Using the same

20 samples, WB was performed using antibodies against myc and Tubulin (right panel).

21 **(F)** myc-EGFP or myc-p15 was expressed in Luc- (control) or p15-depleted OSCs, and

22 WB was performed using antibodies against Nxf2, Panx, Piwi, and Tubulin.

23 **(G)** WB showing Piwi, Panx, Nxf2, and Tubulin (loading control) protein levels upon

24 EGFP (control)-, Piwi-, Panx-, or Nxf2-KD.

1 (H) RNA levels of Piwi, Panx, and Nxf2 were quantified by qRT-PCR upon depletion  
2 of EGFP (control), Piwi, Panx, or Nxf2. Error bars represent SD (n=3).

3

4 **Figure 3. Nxf2 tethered to nascent mRNA causes co-transcriptional silencing.**

5 (A) Schematic of boxB-IN tethering system in OSCs. A genome-integrated luciferase  
6 reporter with 14 copies of boxB sites located within the intronic region of ubiquitin  
7 (Ub).  $\lambda$ N fusion proteins are recruited to luciferase reporter RNA *via* 14 $\times$  boxB.

8 (B) Effects on luciferase activity of the proteins indicated below. OSCs carrying the  
9 reporter gene were transfected with plasmids expressing the indicated proteins and were  
10 harvested at 48 h post-transfection (hpt). Luciferase activities were normalised by the  
11 total protein amount. Bar graph shows luciferase activity relative to that of myc-EGFP  
12 (control). Error bars indicate SD (n=4).

13 (C) qRT-PCR showing effects of the indicated  $\lambda$ N fusion proteins on *Luc* mRNA level  
14 at 48 hpt. Levels of *Luc* mRNA were normalised by *RP49* mRNA. Bar graph shows the  
15 level of *Luc* mRNA relative to myc-EGFP (control). Error bars indicate SD (n=6).

16 (D) Silencing by the enforced tethering of Nxf2 shows Panx and p15 dependent manner.  
17 Bar graph shows luciferase activity relative to that of the sample transfected with EGFP  
18 expression vector (control). Error bars indicate SD (n=3).

19 (E and F) Effects of knockdown of the indicated genes on luciferase activity upon  
20  $\lambda$ N-Nxf2 expression at 48 hpt. Bar graph shows luciferase activity relative to that of the  
21 sample co-transfected with myc-EGFP and siEGFP (control). Error bars indicate SD  
22 (n=3).

23

24 **Figure 4. Nxf2 initiates co-transcriptional silencing before heterochromatin**

1 **formation.**

2 **(A)** Time course of luciferase activity upon  $\lambda$ N-Nxf2 tethering. Bar graph shows

3 luciferase activity relative to that of EGFP at the indicated incubation time. Error bars

4 indicate SD (n=3) (left panel). Expression levels of myc-tagged  $\lambda$ N-Nxf2 were

5 monitored using anti-myc antibody. Tubulin was used as a loading control (right panel).

6 **(B)** ChIP-qPCR analysis of RNA polymerase II occupancy on the *Luc* gene upon

7  $\lambda$ N-Nxf2 tethering. Bar graph shows the occupancy relative to that of the sample

8 transfected with a plasmid expressing EGFP. Error bars indicate SD (n=3).

9 **(C)** ChIP-qPCR analysis of histone H1 and H3K9me3 occupancy on the *Luc* gene. Bar

10 graph shows the occupancy relative to that of the sample transfected with a plasmid

11 expressing EGFP. Error bars indicate SD (n=3).

12 **(D)** Effects of H1 and HP1a on luciferase activity upon  $\lambda$ N-Nxf2 tethering at 48 hpt.

13 OSCs were co-transfected with protein expression vectors and the indicated siRNAs and

14 cultured for 48 h in accordance with the experimental scheme at the top of the figure.

15 Bar graph shows luciferase activity relative to that of the sample expressing EGFP

16 (control). Error bars indicate SD (n=3) (left panel). Western blots showing the protein

17 levels of  $\lambda$ N-myc-Nxf2, H1, HP1a, and Tubulin (loading control) in the same samples

18 (right panel).

19 **(E)** Effects of H1 and HP1a on luciferase activity upon  $\lambda$ N-Nxf2 at 96 hpt. Transfection

20 schedule of plasmids and siRNAs is shown at the top of the figure. siRNA transfection

21 was carried out at 48h, since the depletion effect reaches maximum after 48 hpt. Bar

22 graph shows luciferase activity relative to that of the sample expressing EGFP (control).

23 Error bars indicate SD (n=3).

1  
2 **Figure 5. Nxf2 associates with Piwi–piRNA silencing complex to target RNA *via* its**  
3 **first LRR region.**  
4 **(A)** Schematic of full-length Panx protein and deletion mutants. Predicted NLS and  
5  $\alpha$ -helices and  $\beta$ -strands are indicated (left panel). The results of rescue experiments are  
6 summarised (right panel).  
7 **(B)** Western blot (WB) of EGFP-Immunoprecipitation (IP) product from lysate of  
8 EGFP-tagged Panx deletion construct-expressing OSCs, using EGFP, Nxf2, and Piwi  
9 antibody.  
10 **(C)** Schematic of full-length Nxf2 and deletion mutant proteins. LRR: leucine-rich  
11 repeat domain, NTF2-like: nuclear transport factor 2-like domain, UBA:  
12 ubiquitin-associated domain (left panel). The results of rescue experiments and tethering  
13 assay are summarised (right panel).  
14 **(D)** IP using anti-myc antibody from lysate of OSCs expressing myc-tagged Nxf2  
15 proteins, followed by WB using anti-myc or -Panx antibody.  
16 **(E)** *mdg1* expression levels were monitored by qRT-PCR in OSCs expressing  
17 exogenous Nxf2 proteins treated with either siLuc (control) or siNxf2 (left panel). Error  
18 bars indicate SD (n=3). Exogenous Nxf2 mRNAs are resistant to siRNA for Nxf2.  
19 Expression levels of Panx- and myc-tagged Nxf2 proteins were confirmed by WB using  
20 anti-myc and -Panx antibodies. Tubulin was used as a loading control. Asterisk  
21 indicates the background signal (right panel).  
22 **(F)** Effects of  $\lambda$ N fusion Nxf2 proteins on luciferase activity at 48 hpt. Error bars  
23 indicate SD (n=3) (left panel). Expression levels of exogenous  $\lambda$ N-HA–myc–Nxf2  
24 proteins (right panel).

1 (G) Electrophoretic mobility shift assay (EMSA) showing the binding of the first LRR  
2 region of Nxf2 (1–285 aa) to single-stranded RNA. The indicated amount of  
3 recombinant protein was mixed with 1 nM single-stranded RNA (16 nt).

4

5 **Figure 6. Nxf2 associates with nascent transcript of Piwi–piRNA-targeted TEs.**

6 (A) Scatterplot of RPM values for myc–Nxf2 CLIP tags (y-axis) and SMinput reads  
7 (x-axis) mapped to TEs in EGFP (control)-KD samples. Both x- and y-axes are log<sub>10</sub>  
8 scales. Sense reads are plotted in black and antisense reads in red (left panel). TEs for  
9 which the expression level differed from that of the control by more than tenfold or  
10 fivefold in Piwi-KD (Piwi–piRNA-targeted TEs) are plotted in orange or yellow,  
11 respectively (right panel).

12 (B) Scatterplot as in (A). The plot was created using myc–Nxf2 CLIP data from  
13 Piwi-KD samples.

14 (C) Scatterplot as in (A). The plot was created using Piwi CLIP data. Note that RNAs  
15 used for creating Piwi CLIP libraries are in the size range of 43–73 nt, and therefore  
16 piRNAs are excluded.

17 (D) Boxplots showing fold changes of the indicated CLIP tags to SMinput, for Piwi–  
18 piRNA-targeted and un-targeted TEs. Piwi–piRNA-targeted TEs are defined based on  
19 RNA-seq analysis (Figure 1). Reads mapped to sense direction of indicated TEs were  
20 used for calculation of CLIP tag fold change, and TEs with SMinput signal under 0.5  
21 RPM were eliminated. Boxplot whiskers show maxima and minima. *p*-values were  
22 calculated by the Wilcoxon rank-sum test.

23 (E) Heatmaps displaying fold changes of TE expression with indicated siRNA  
24 knockdown (normalized to EGFP-KD), and Piwi-associated piRNA levels obtained

1 from small RNA-seq (RPM). The CLIP-seq diagram indicates fold changes of Piwi  
2 CLIP tags, and myc-Nxf2 CLIP tags relative to SMinput, obtained upon EGFP- or  
3 Piwi-KD. Reads mapped to sense direction of indicated TEs were used for calculation  
4 of CLIP tag fold change, and TEs with SMinput signal under 0.5 RPM were eliminated.  
5 Piwi-bound piRNA levels were determined by using reads mapped to antisense of the  
6 indicated TEs.

7 **(F)** Density plots for myc-Nxf2 CLIP tags (blue plots), Piwi-CLIP tags (red plots), and  
8 Piwi-piRNA reads (orange plots) over the consensus sequence from *mdg1*, *gypsy*, and  
9 *DM297* (Piwi-piRNA target TEs). The LTR region of each TE is illustrated in green.  
10 SMinput is overlaid in black at each plot. y-axis has been adjusted to 100 for the plot of  
11 Piwi CLIP tags mapped to *mdg1*.



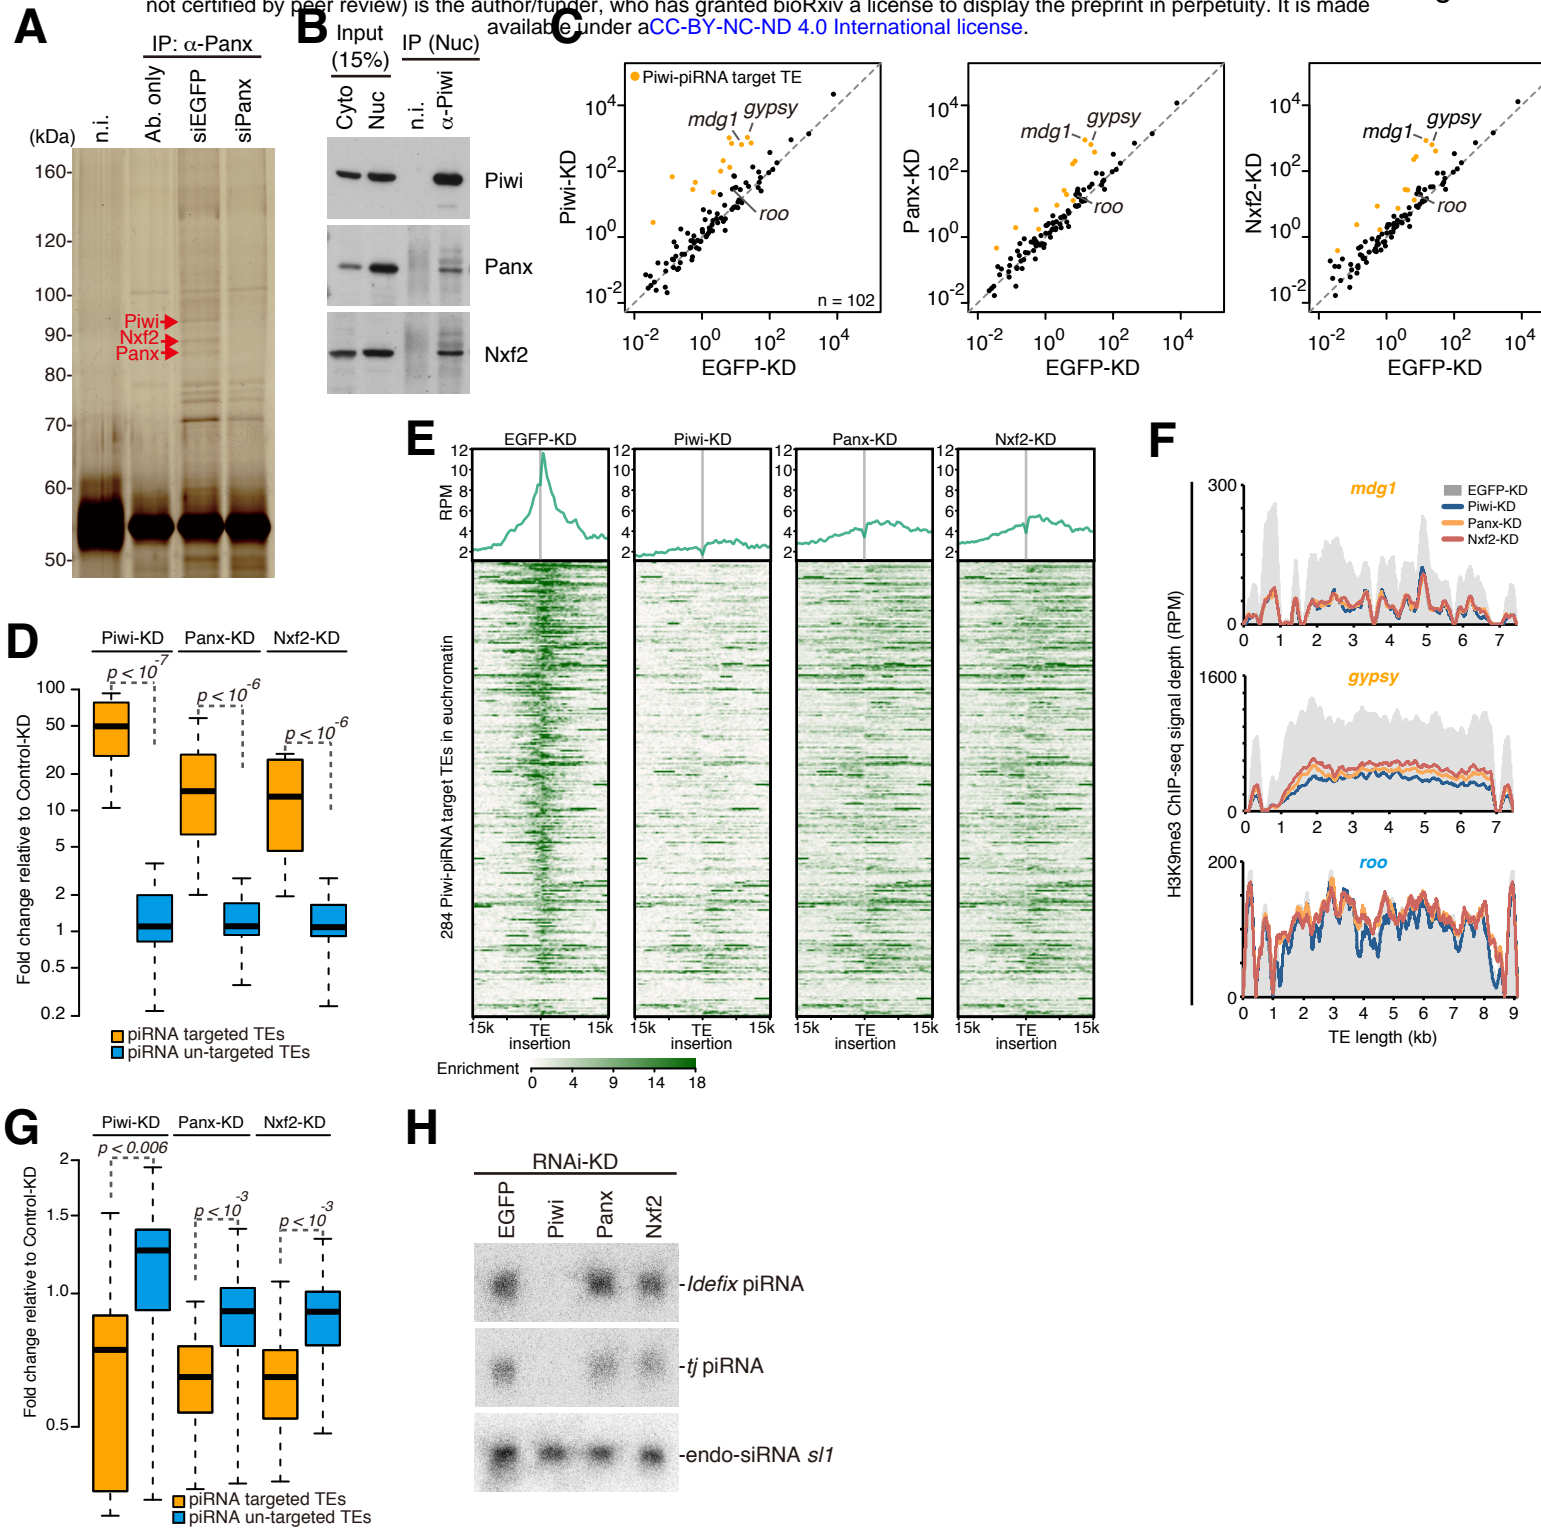

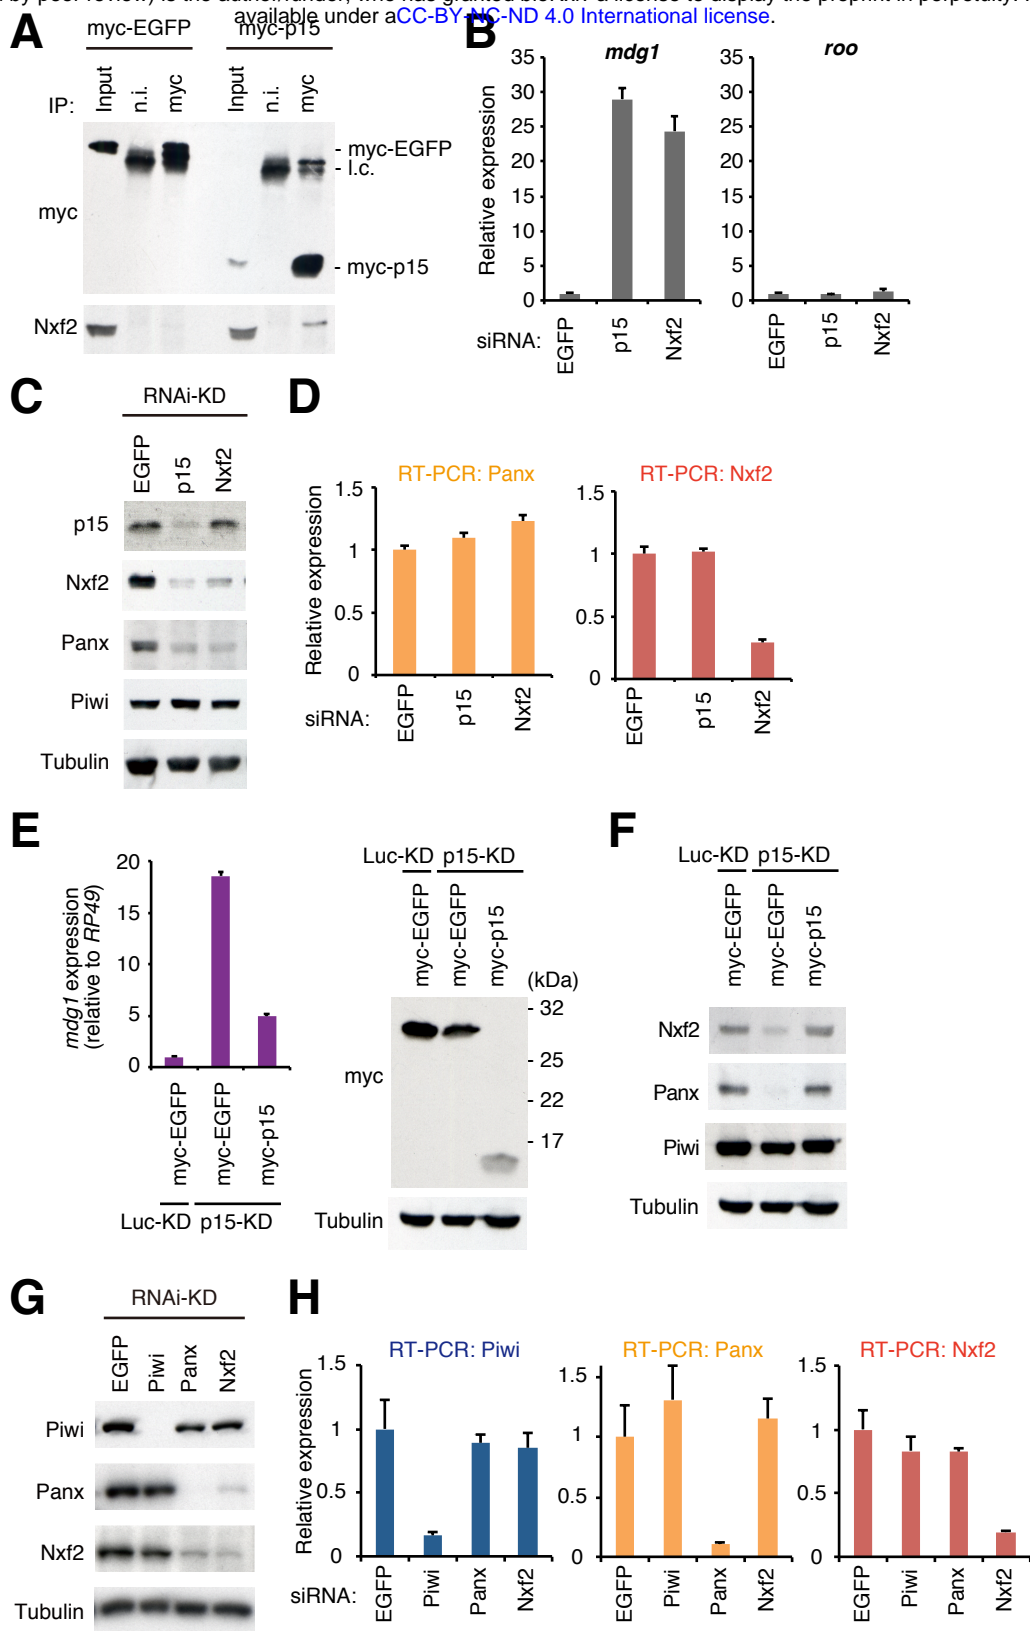

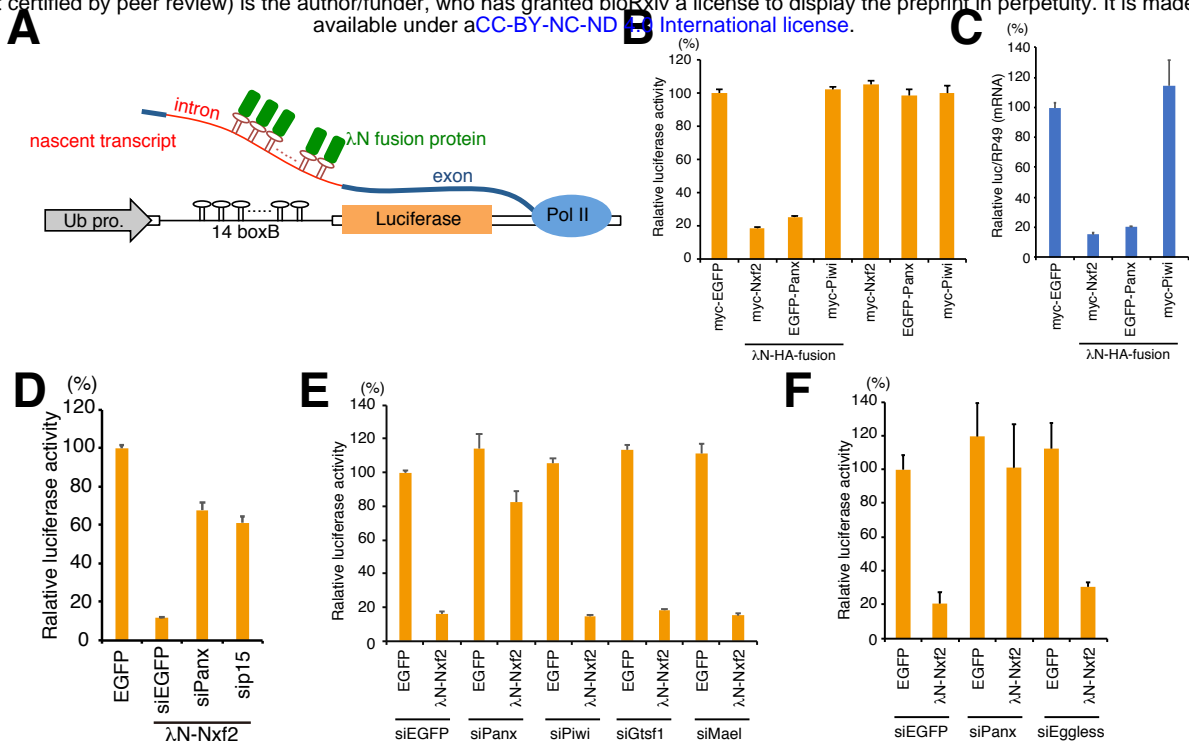

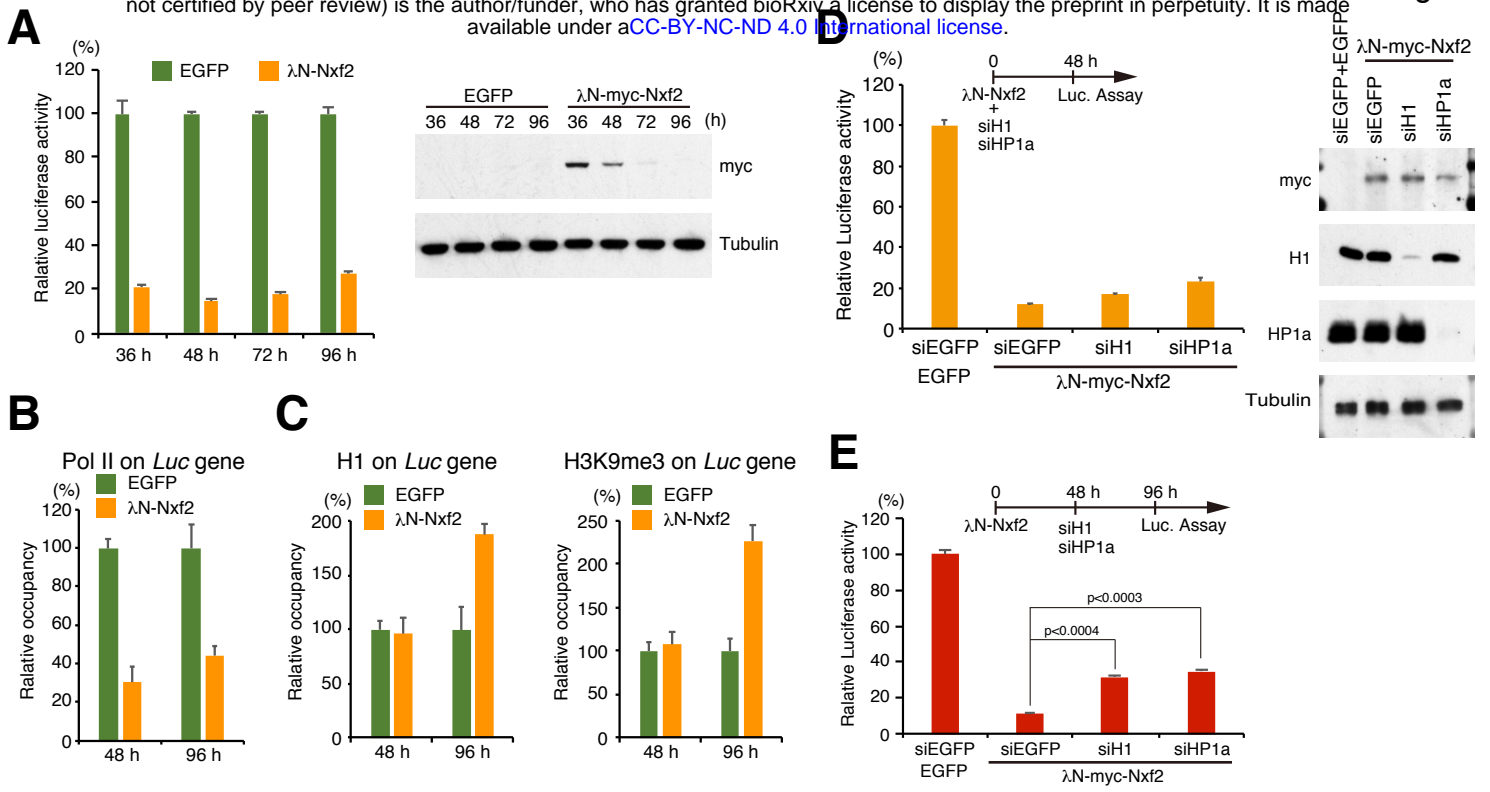

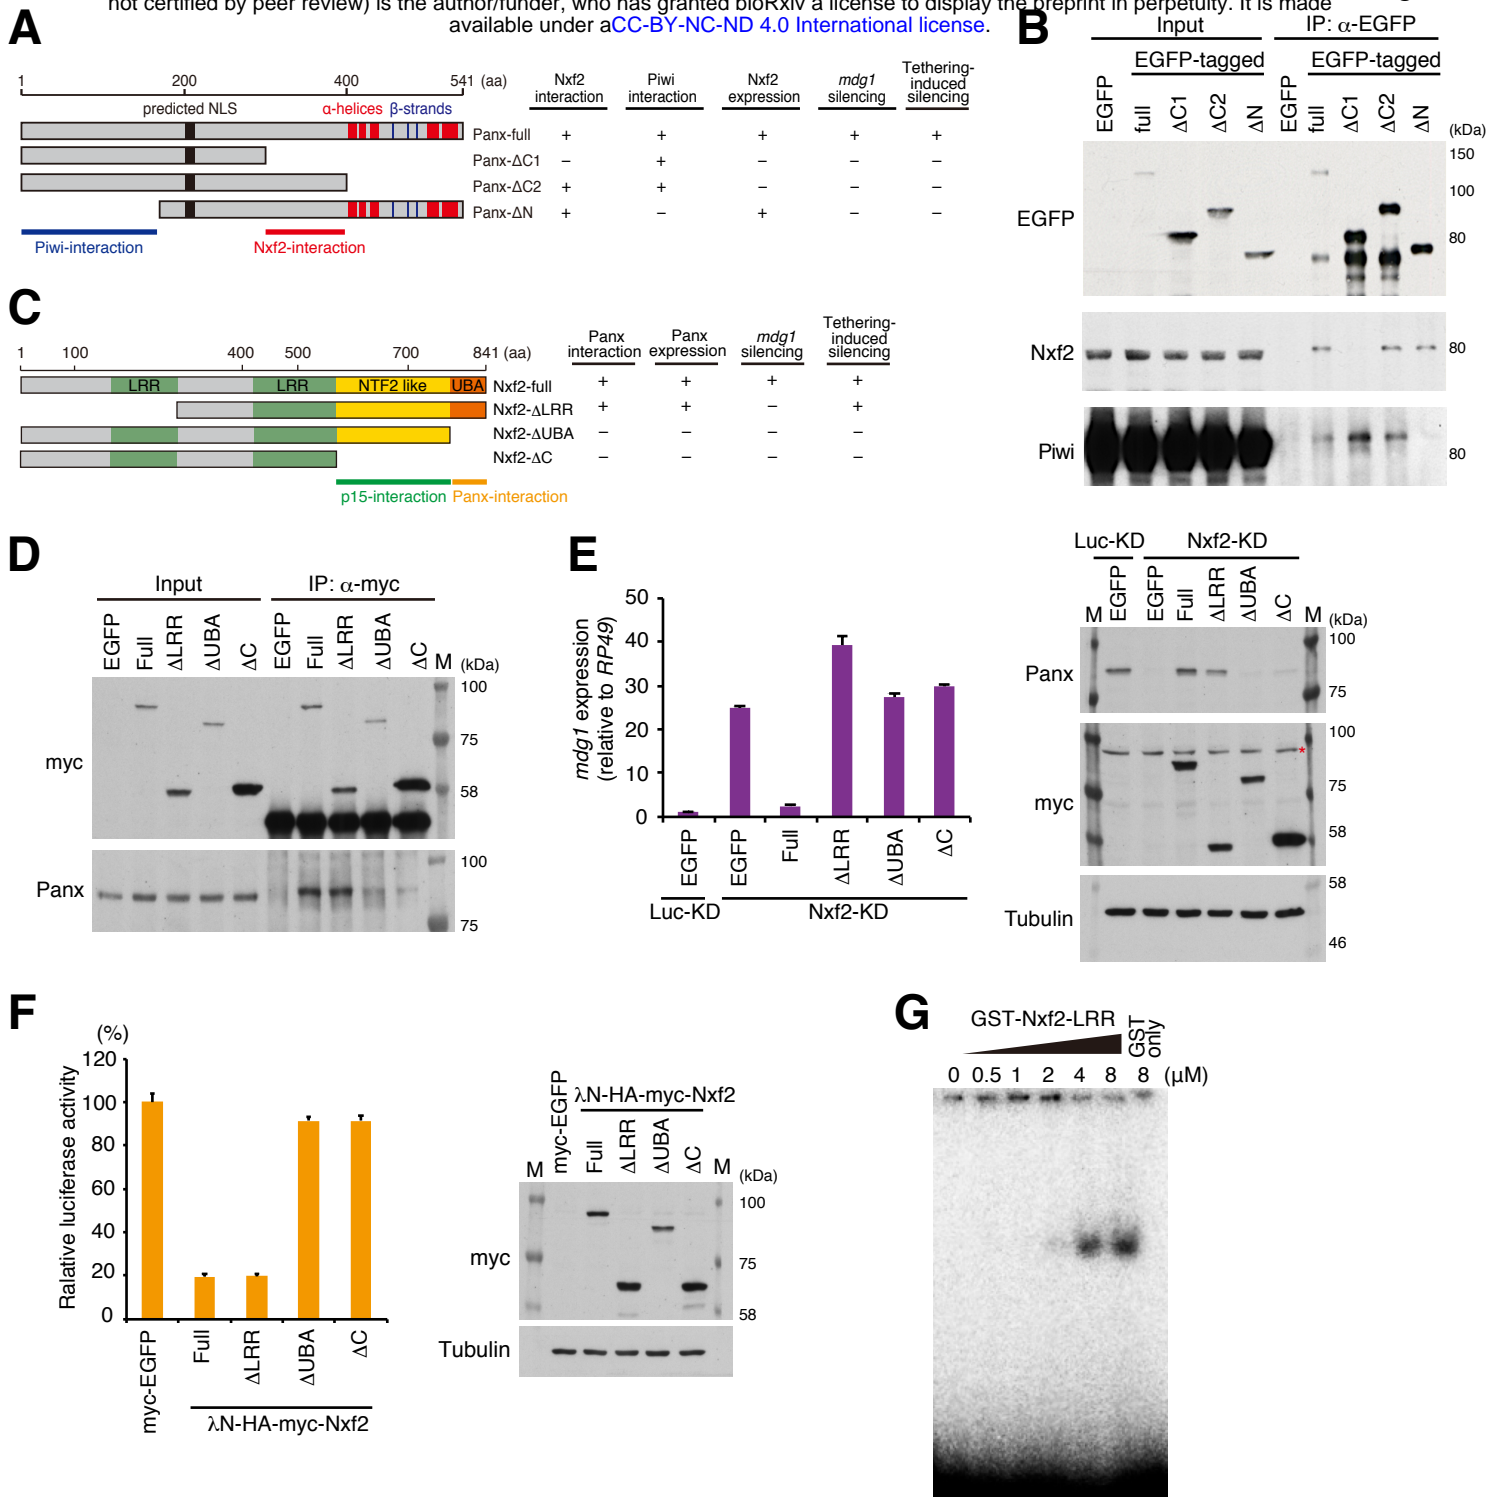

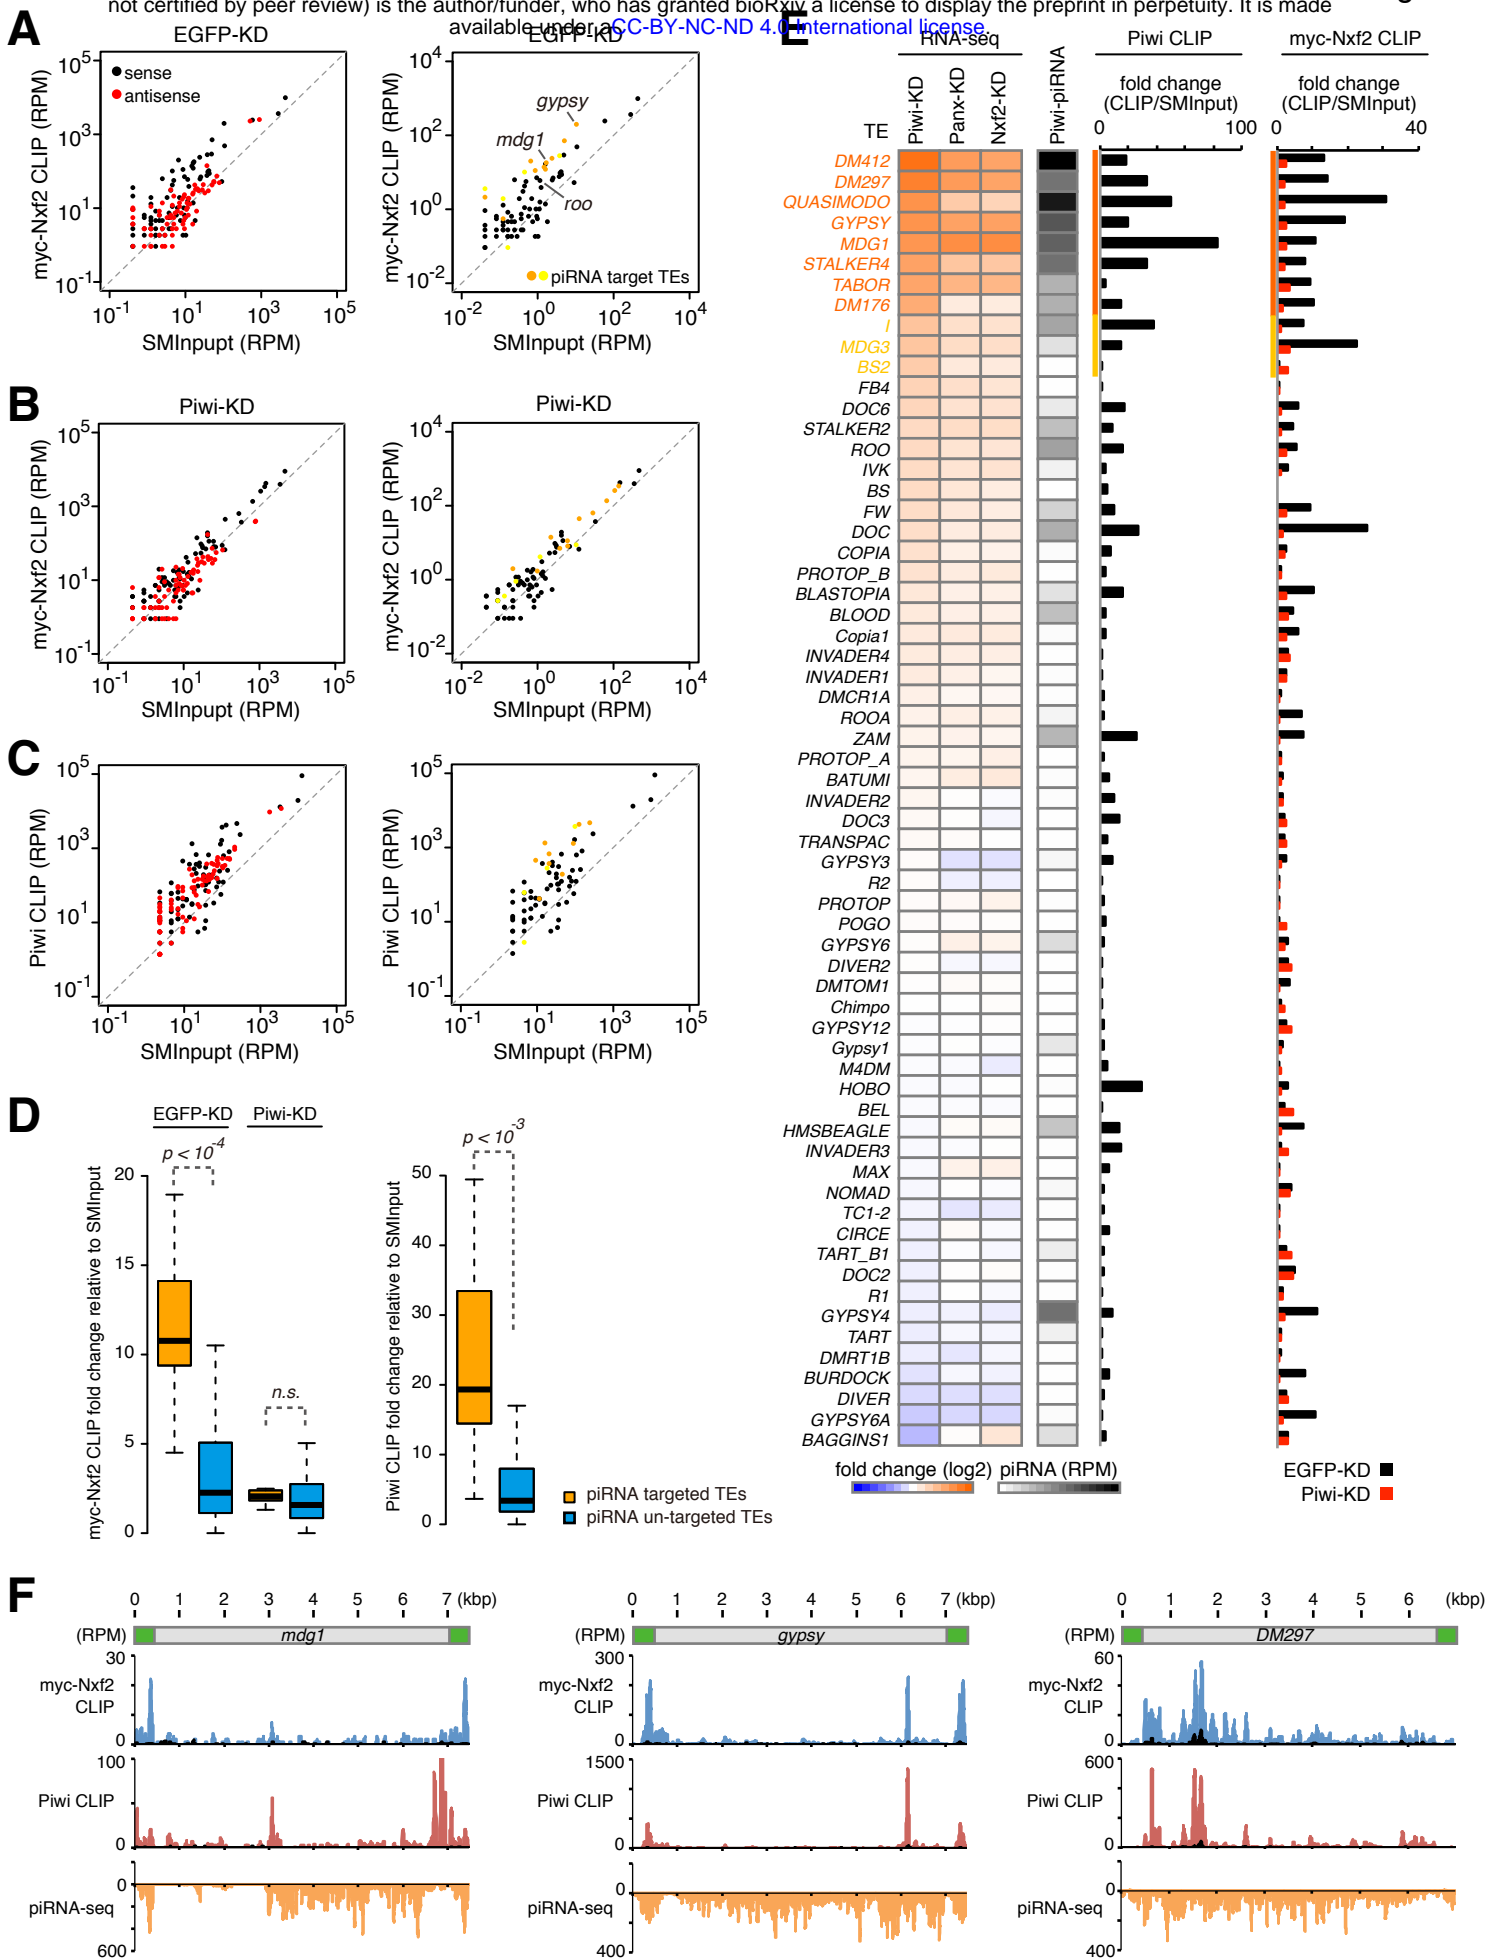

Source: https://www.biorxiv.org/content/10.1101/605725v1.full.pdf
